# Supplementary material for: Comprehensive analysis of clinical Burkholderia pseudomallei isolates demonstrates conservation of unique lipid A structure and TLR4-dependent innate immune activation
Source: PubMed Central journal article supplement (PMC5842036; doi:10.1371/journal.pntd.0006287), 2018-02-23

S1 Fig. Tandem MS spectra by ESI-QqTOF

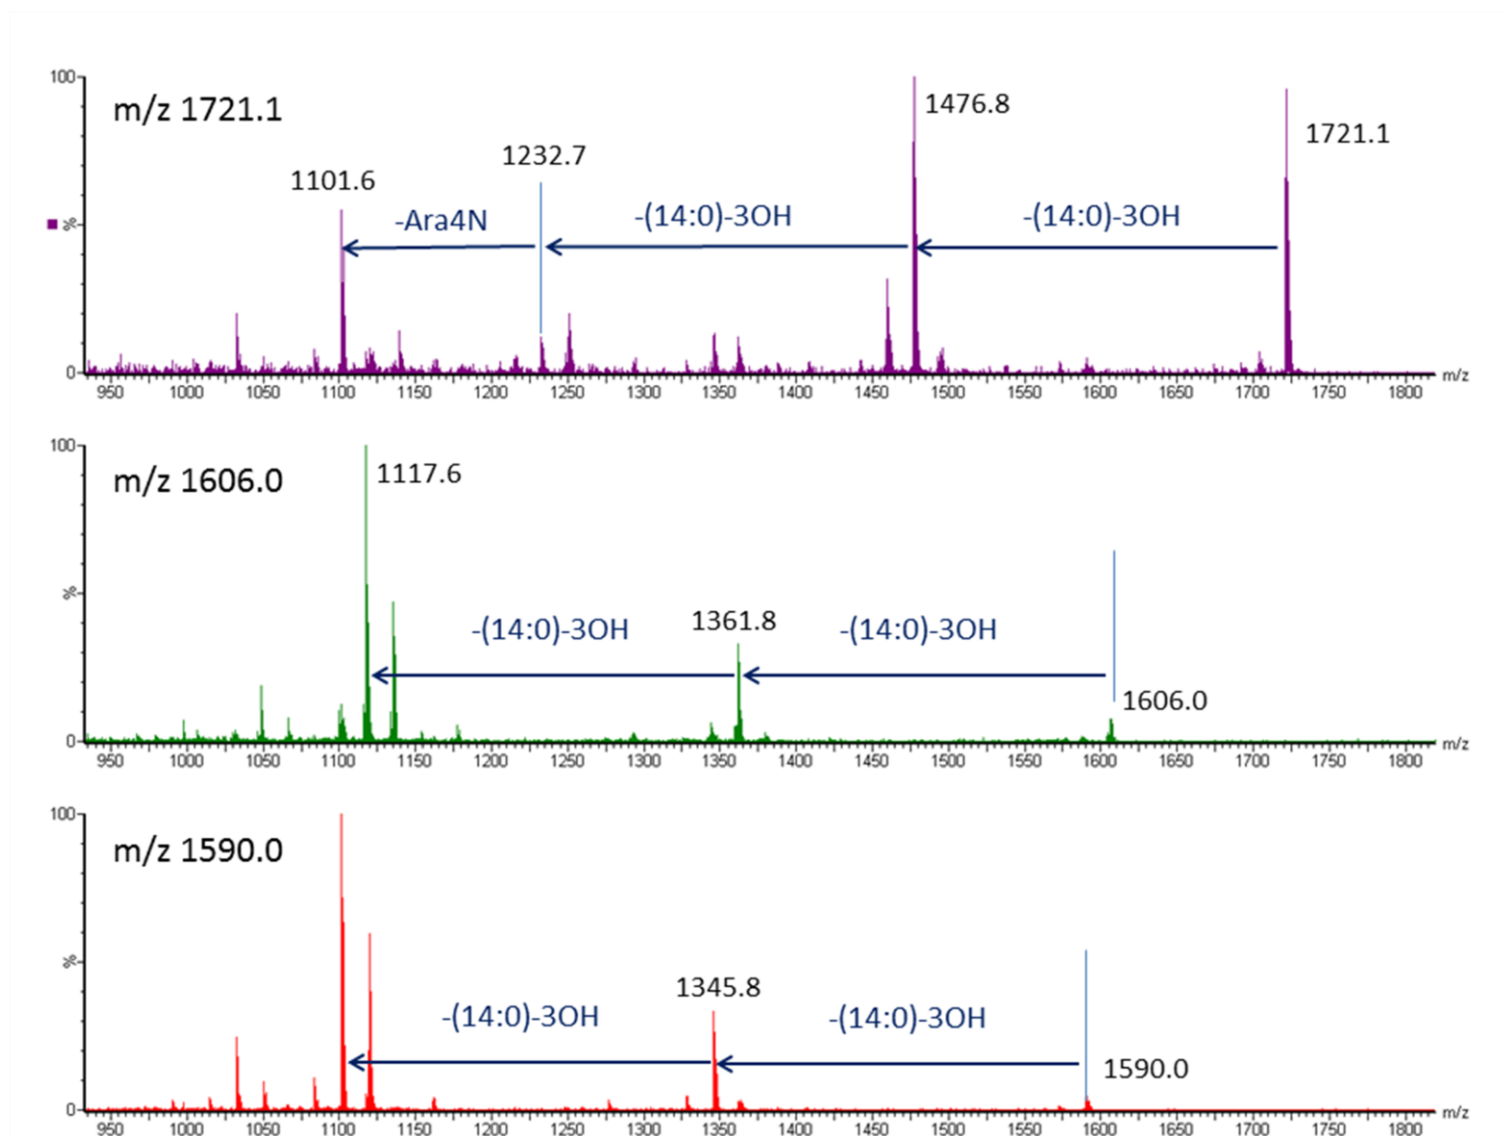

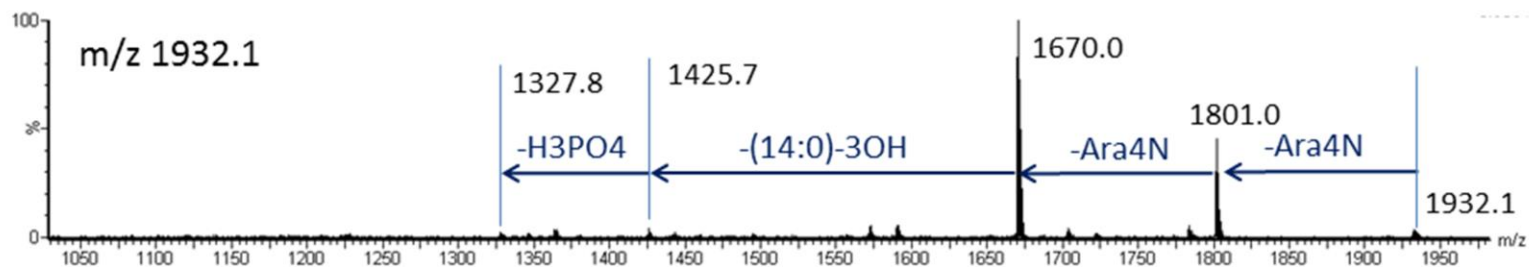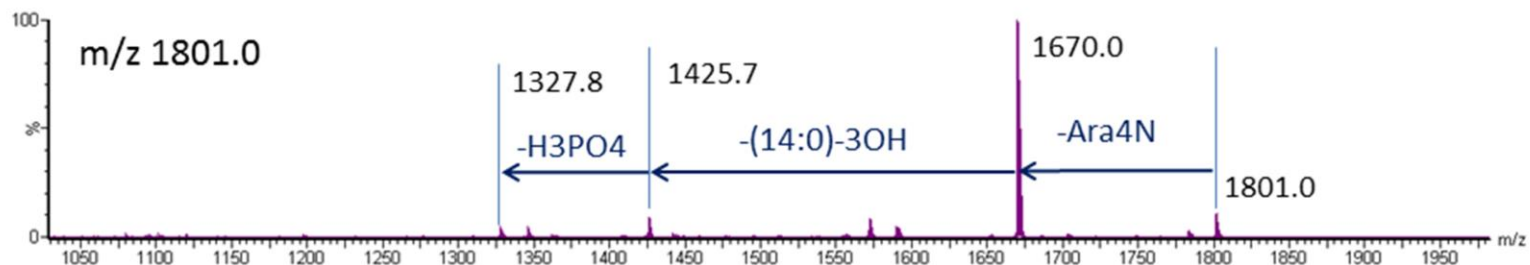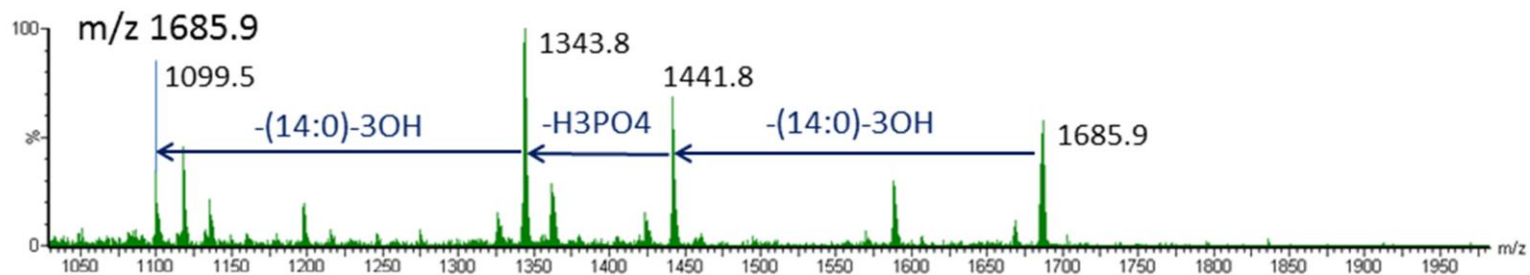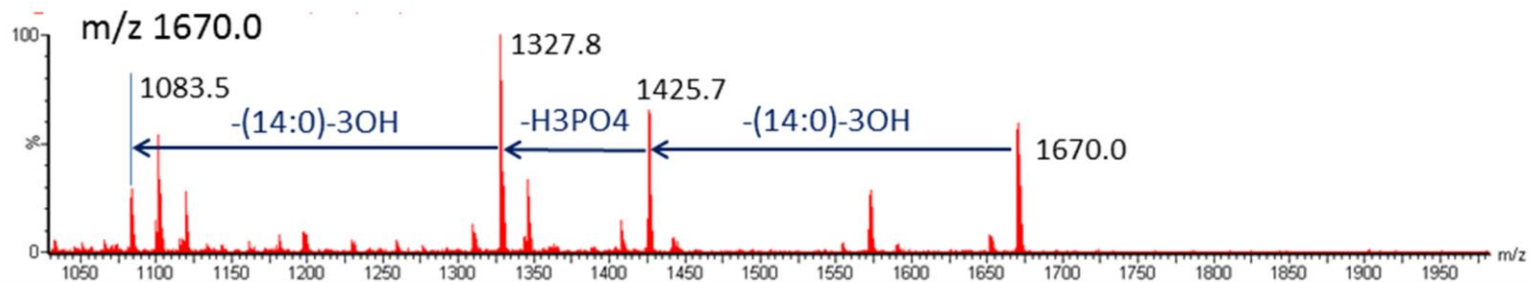

Supplement: pntd.0006287.s001.pdf [file pntd.0006287.s001.pdf]
