# Supplementary material for: Comprehensive analysis of clinical Burkholderia pseudomallei isolates demonstrates conservation of unique lipid A structure and TLR4-dependent innate immune activation
Source: PubMed Central journal article supplement (PMC5842036; doi:10.1371/journal.pntd.0006287), 2018-02-23

S2 Fig. MALDI-TOF lipid A spectra of clinical isolates of *B. pseudomallei* from 68 Thai patients with primary infection

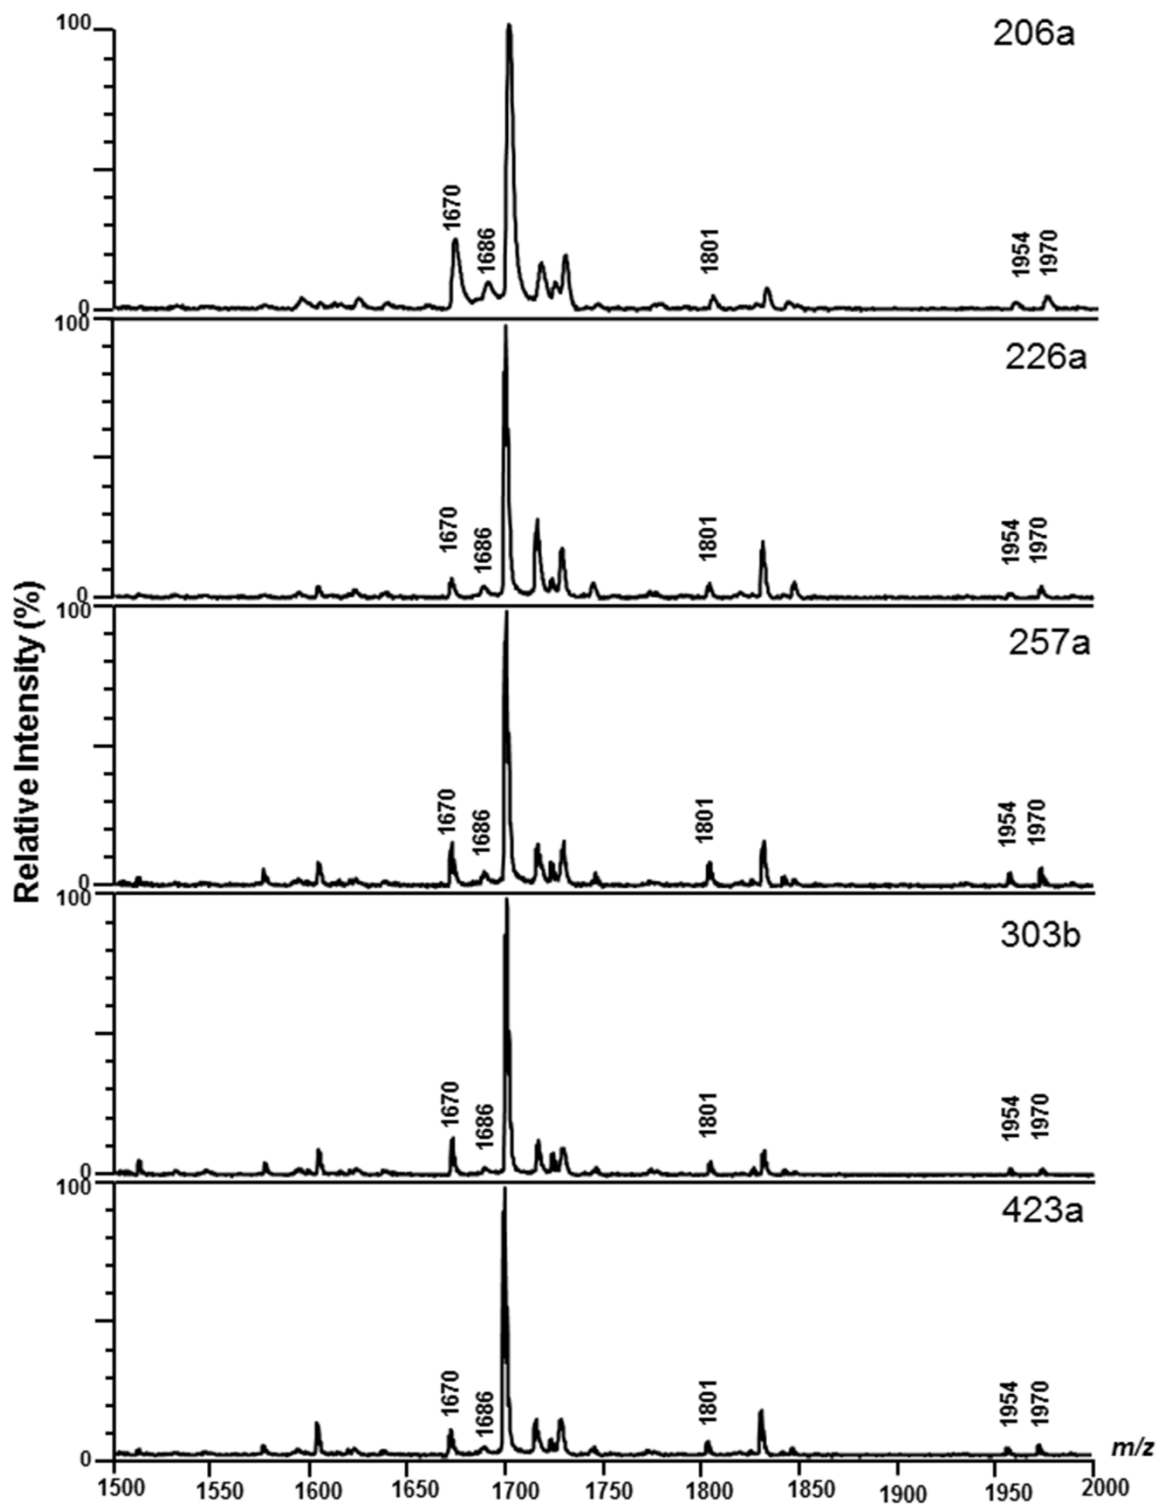

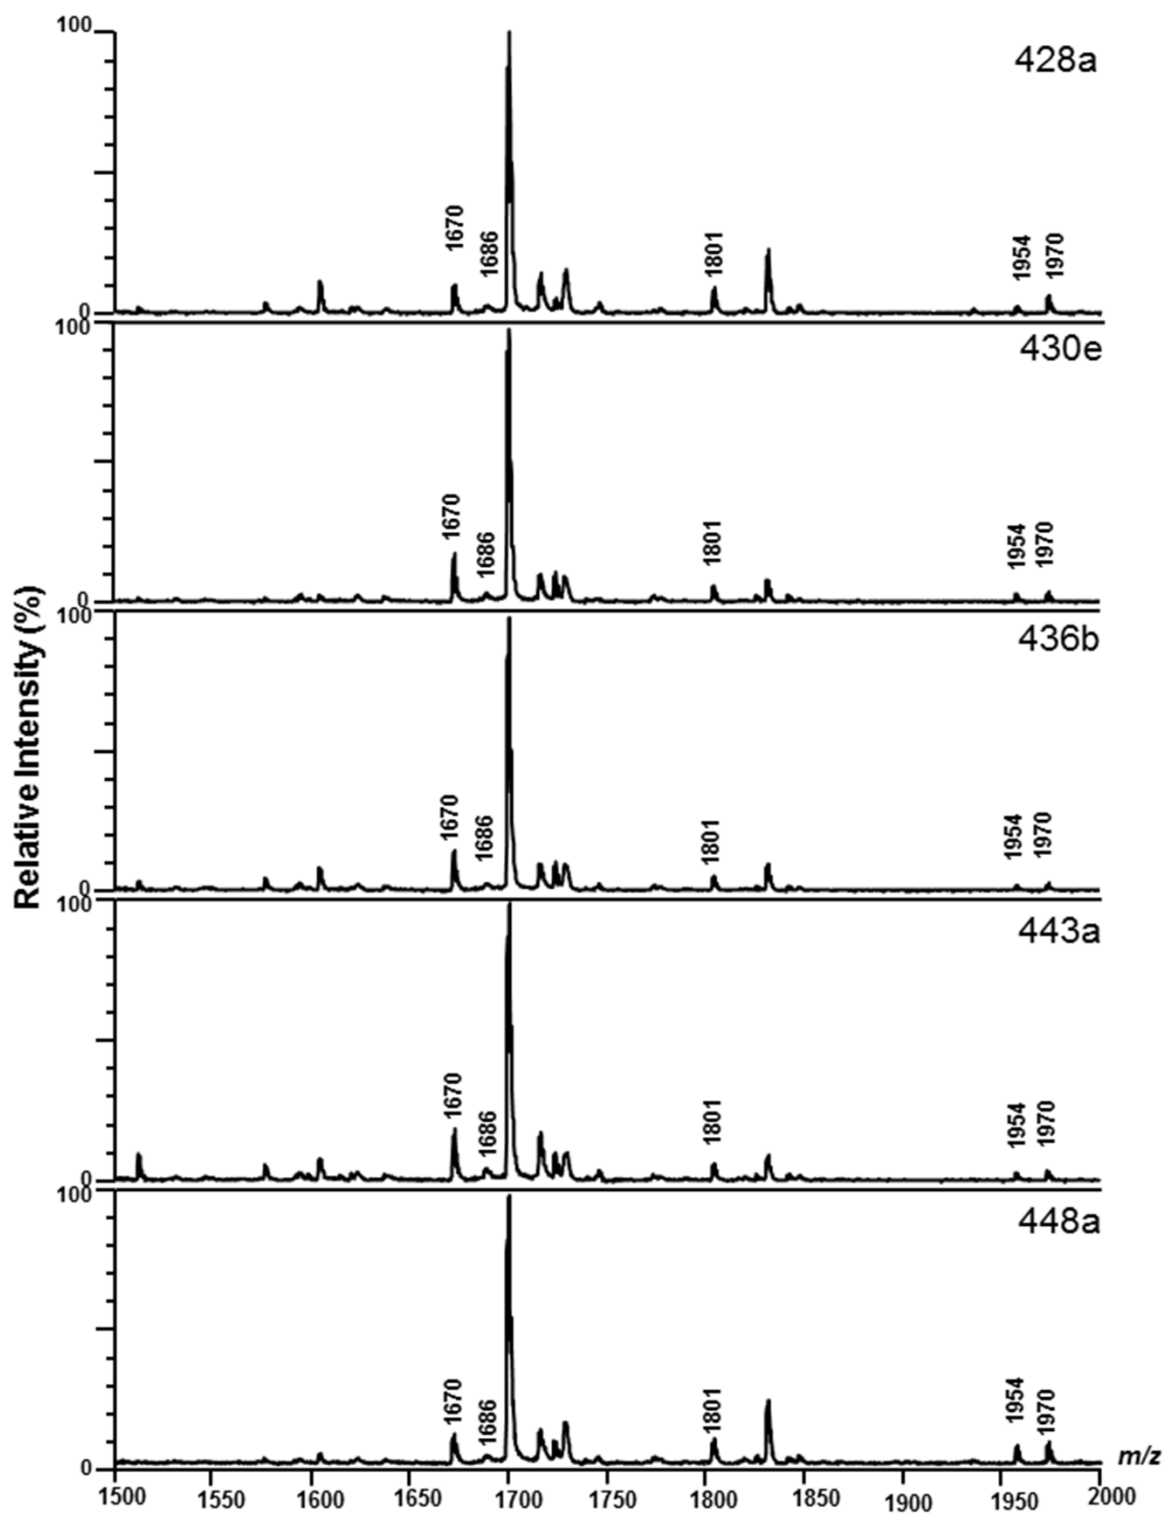

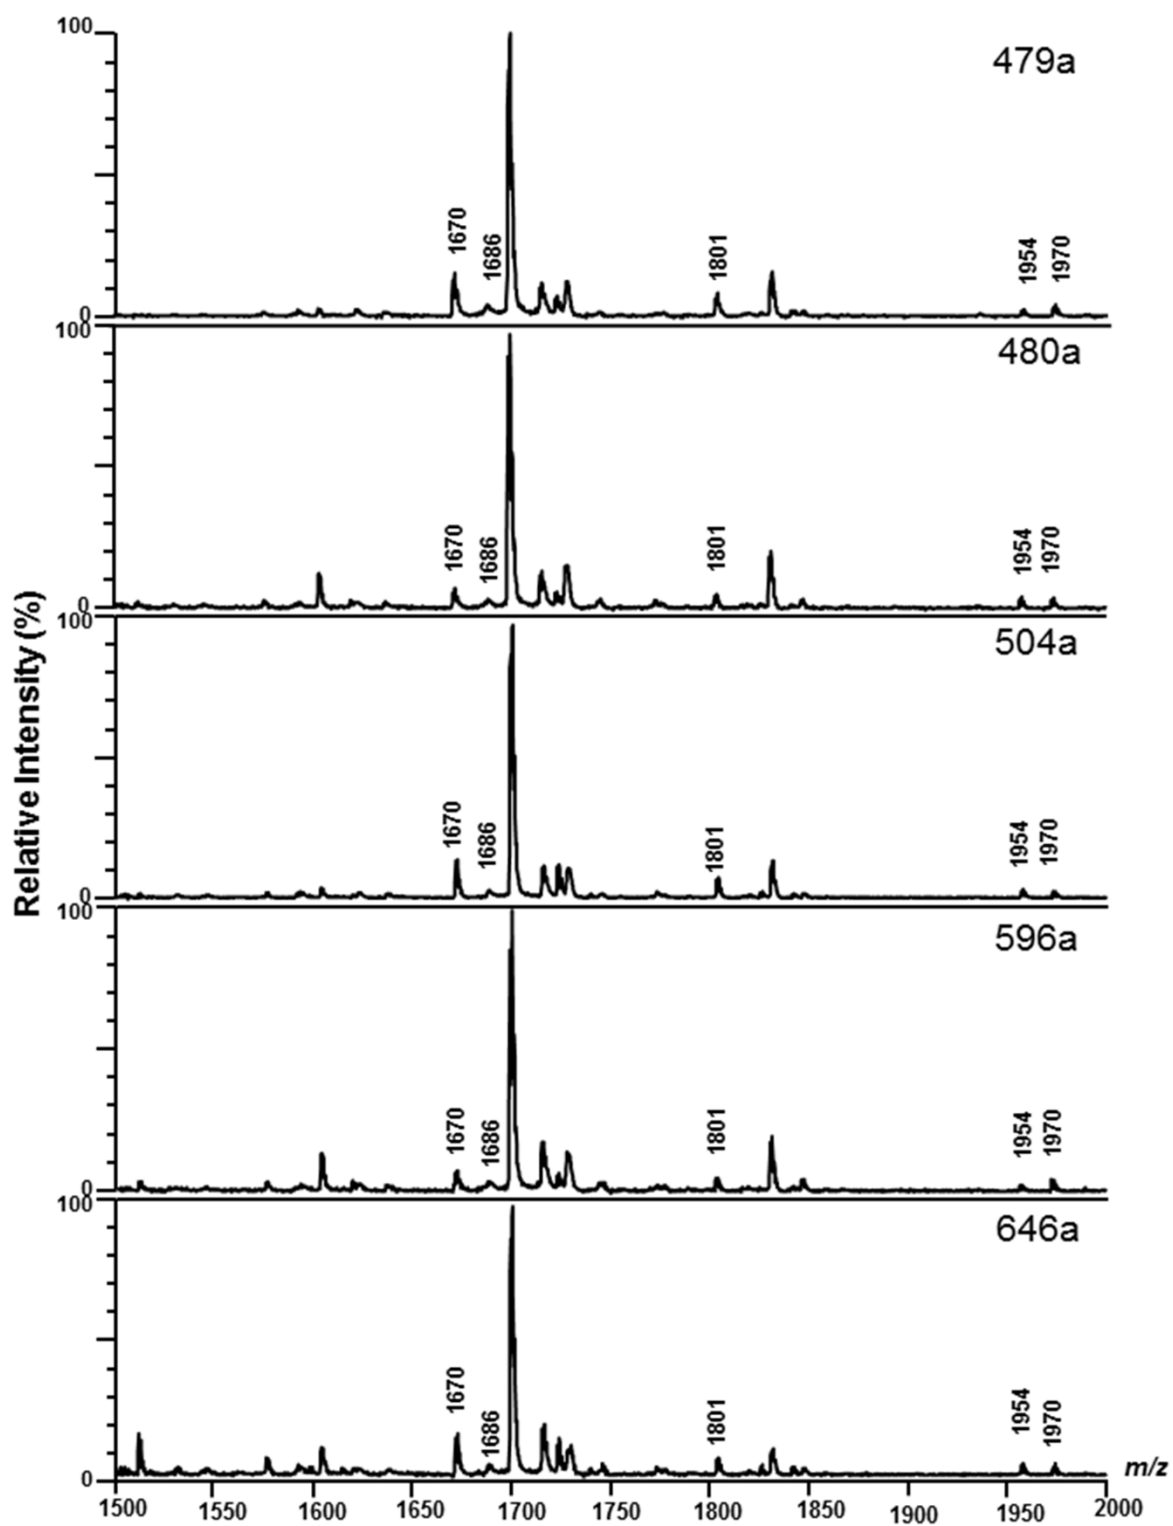

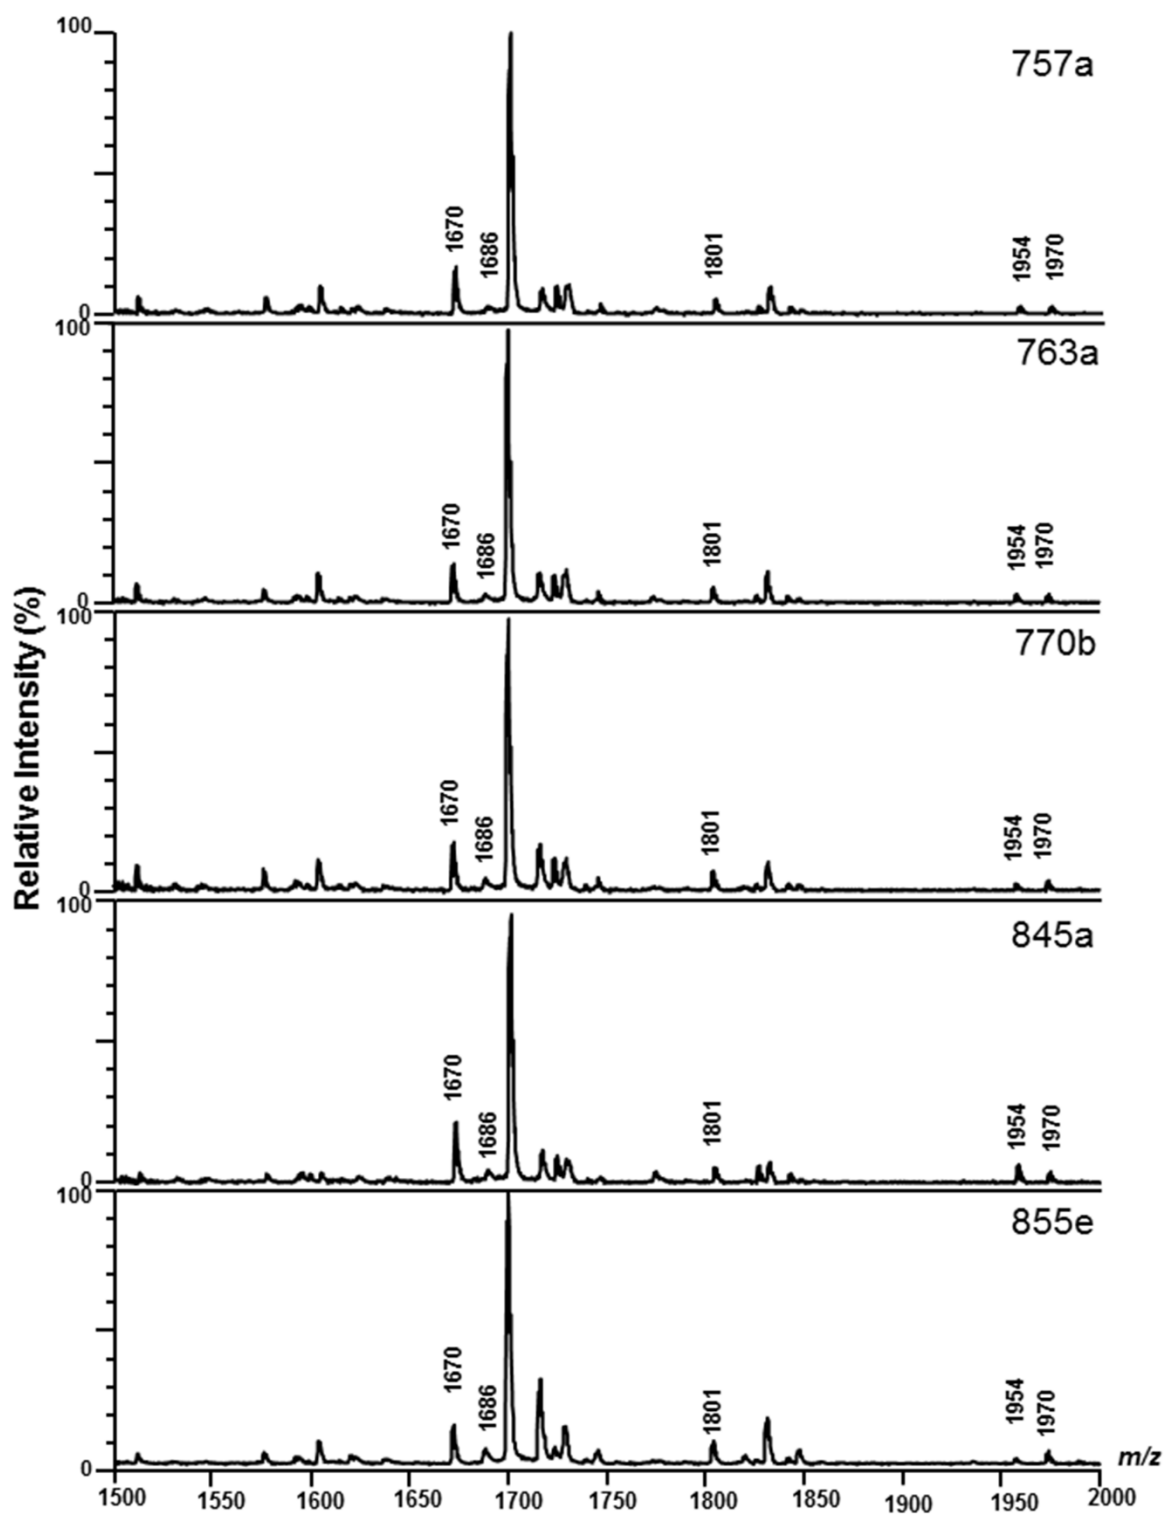

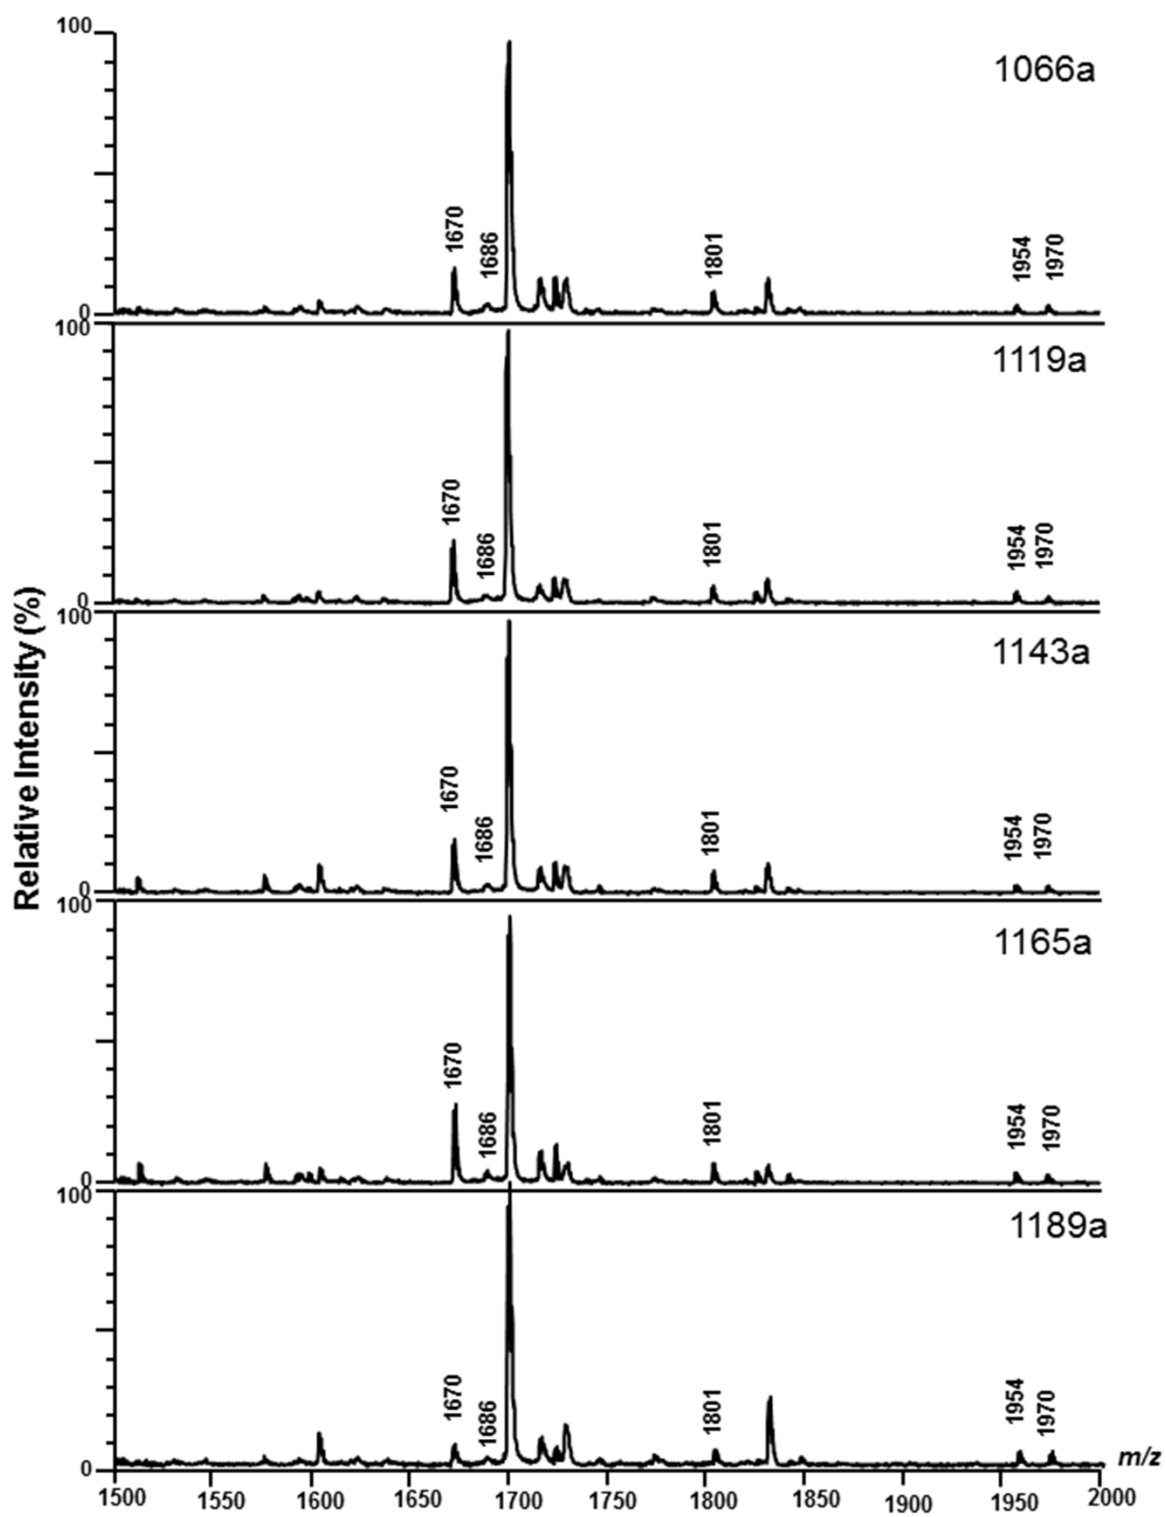

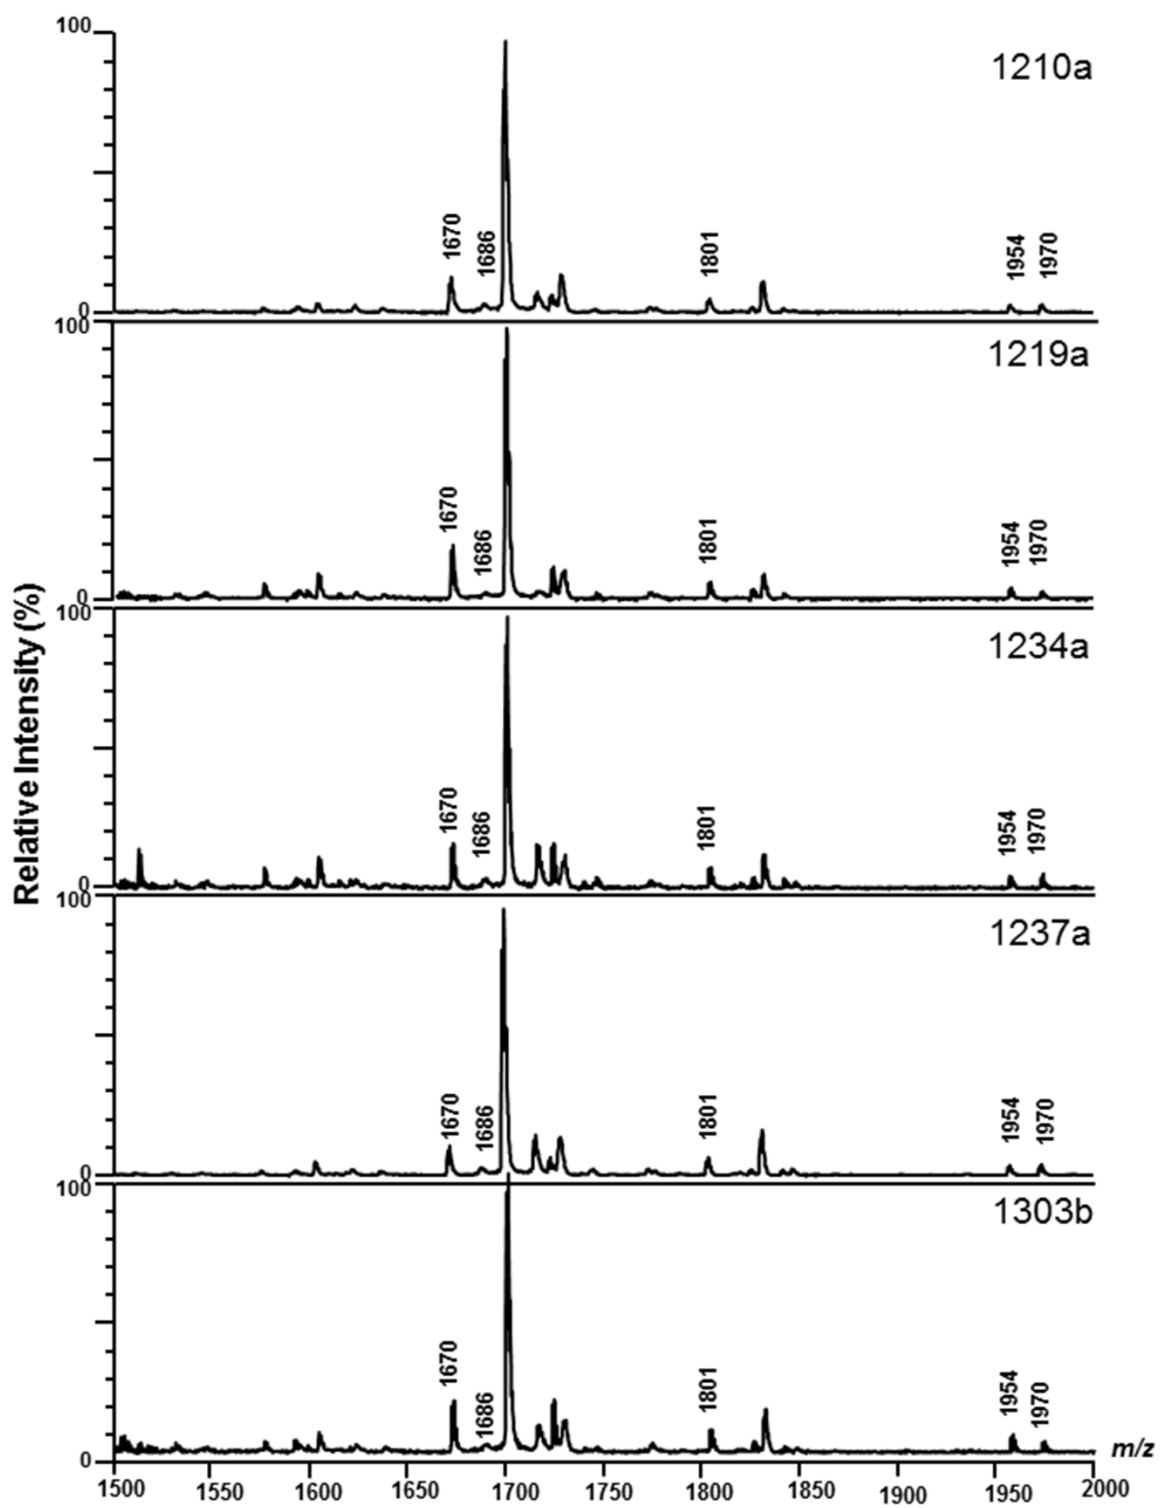

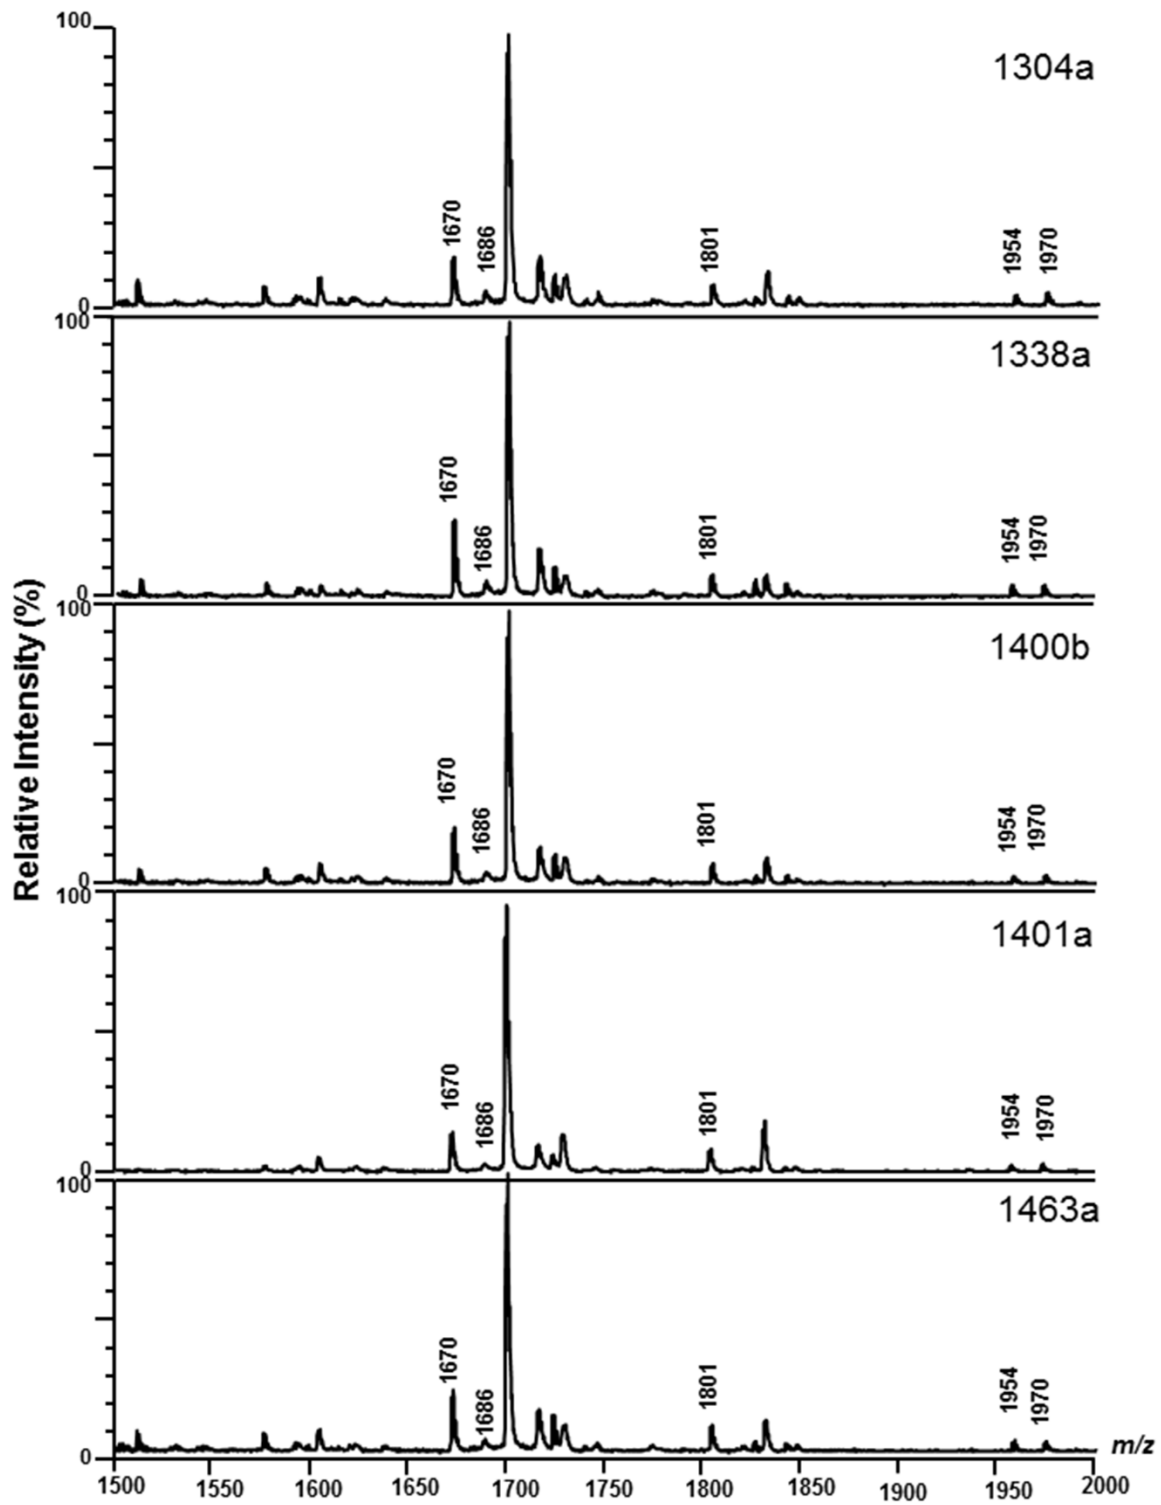

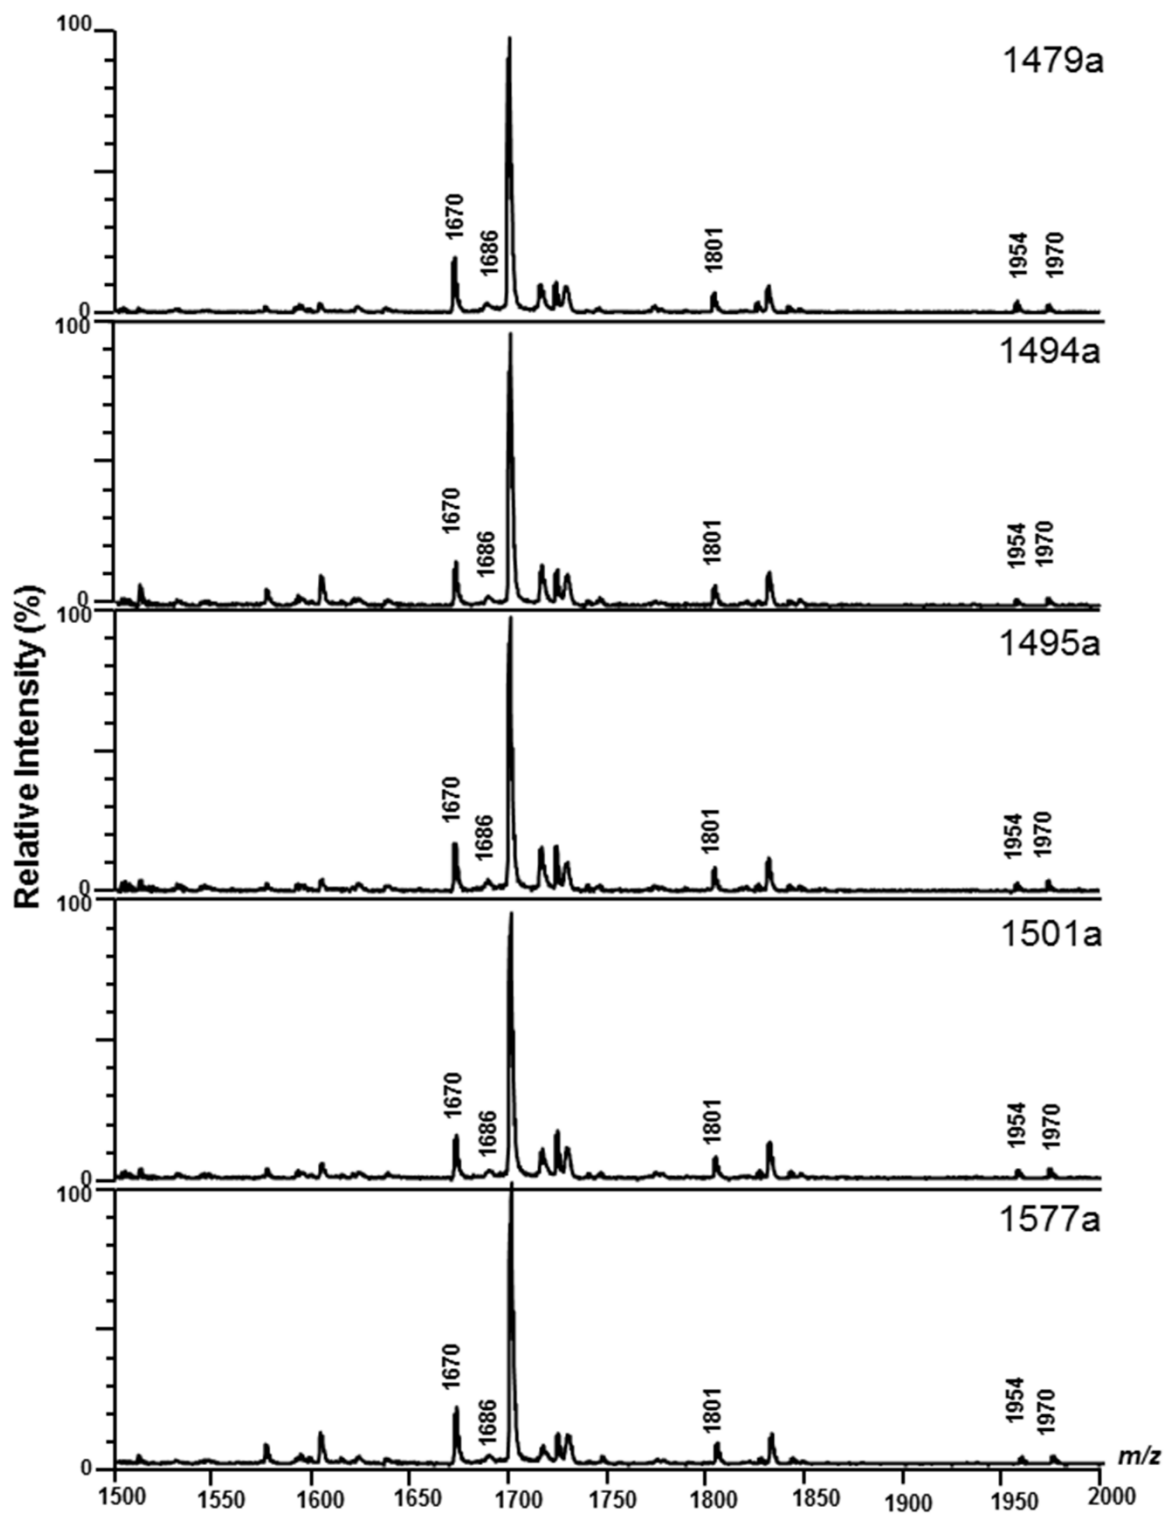



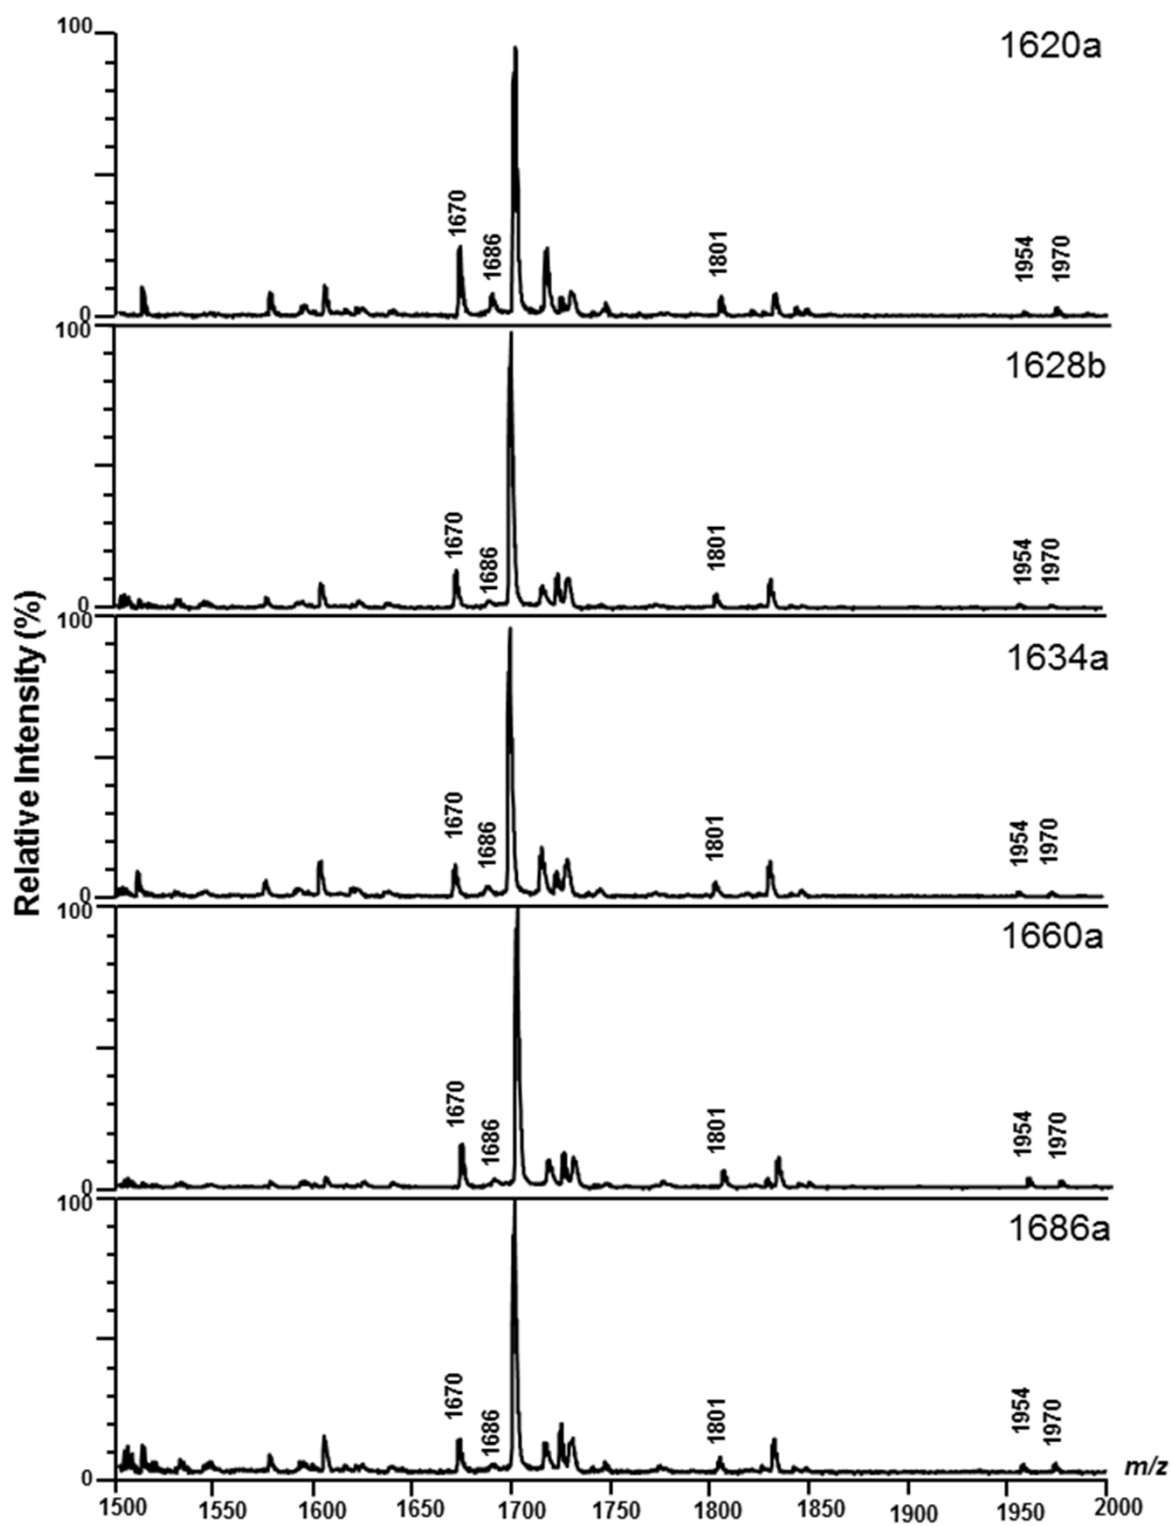

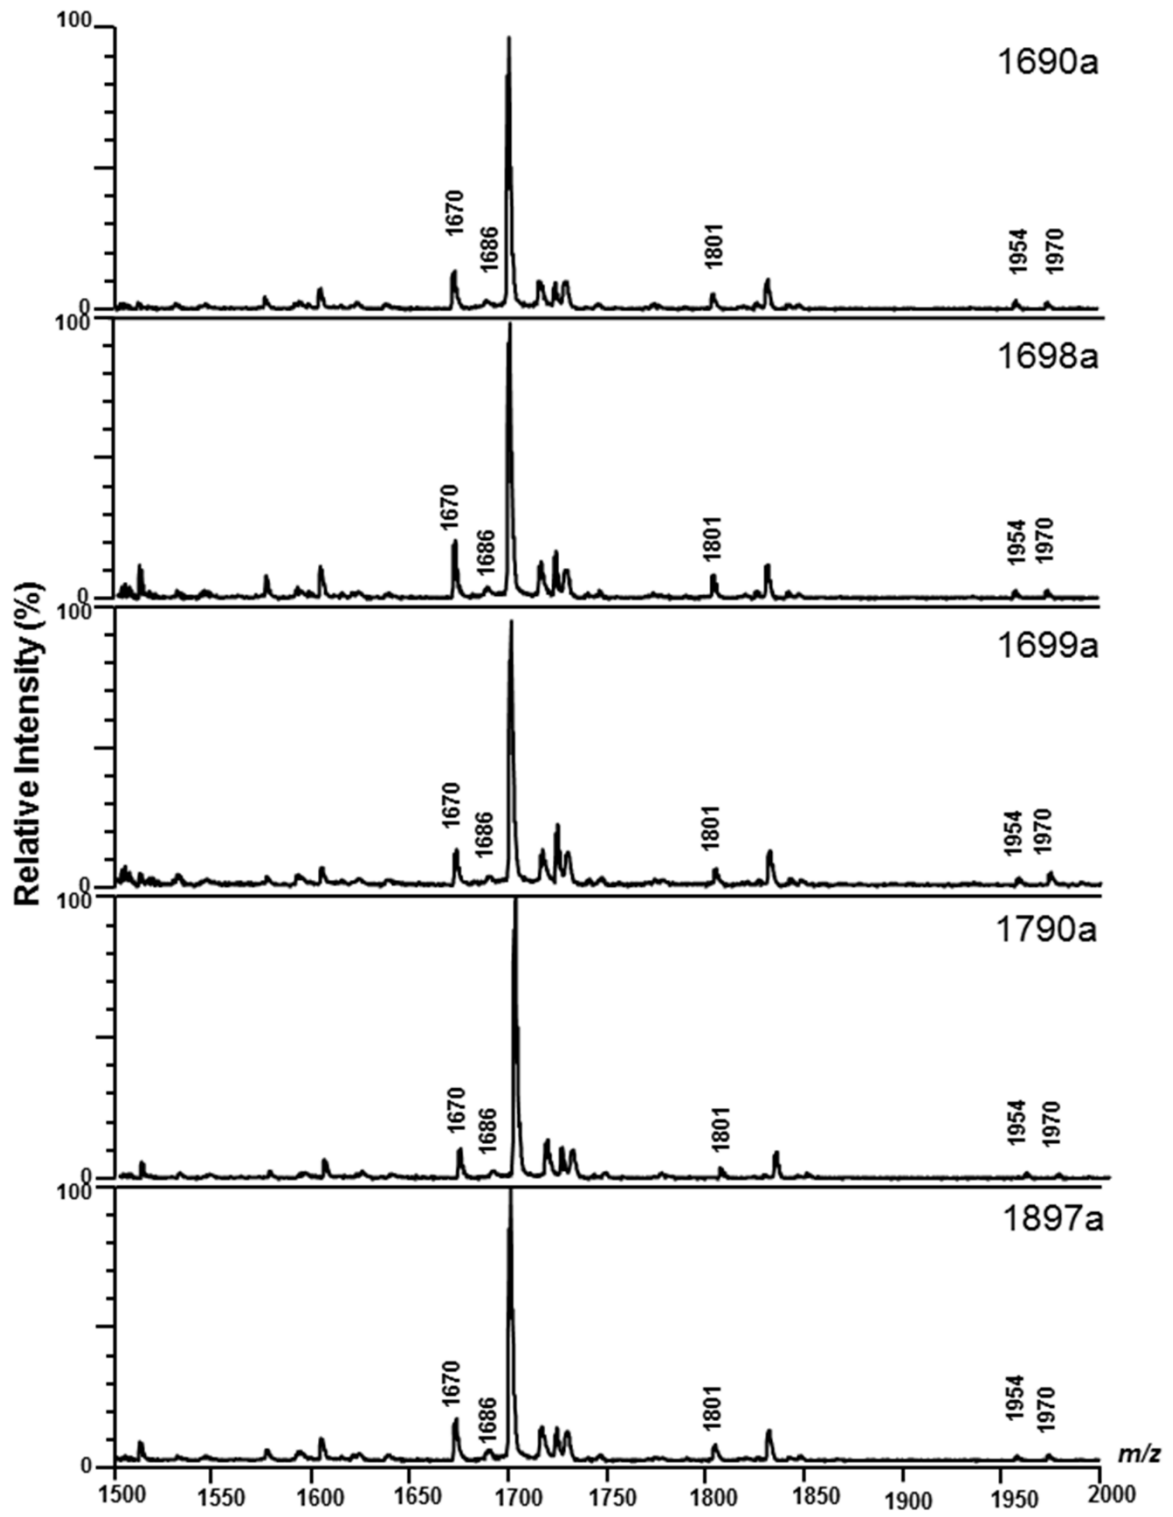

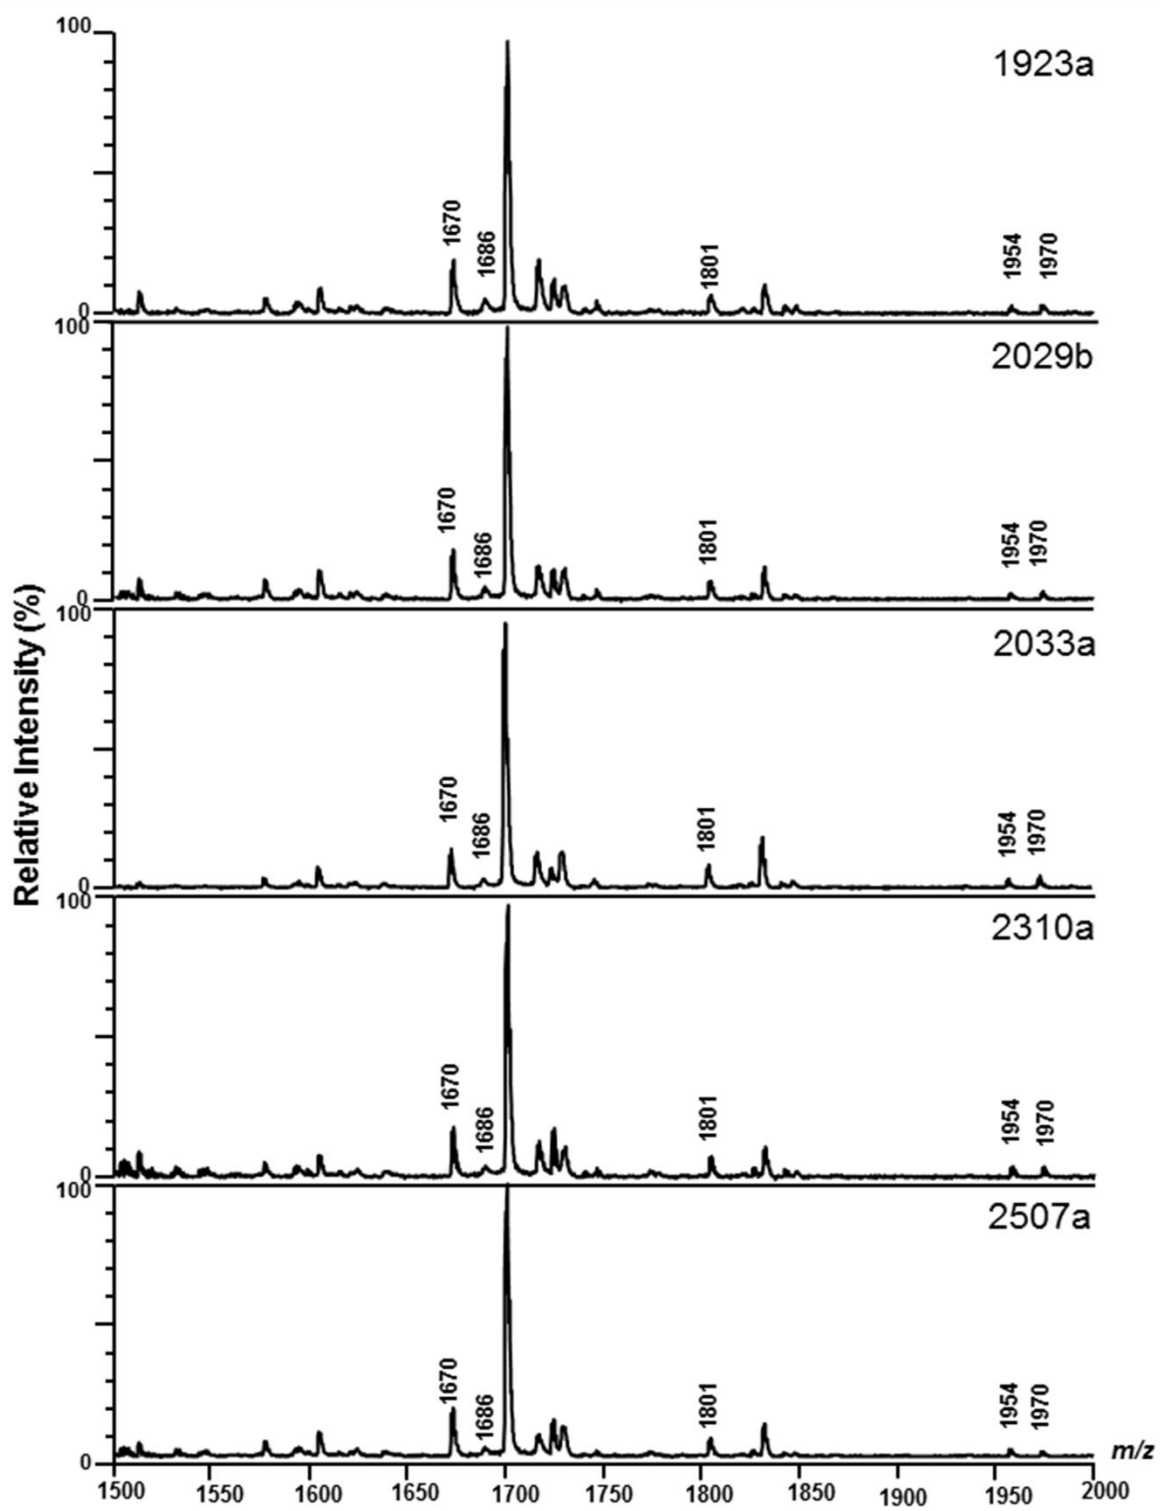

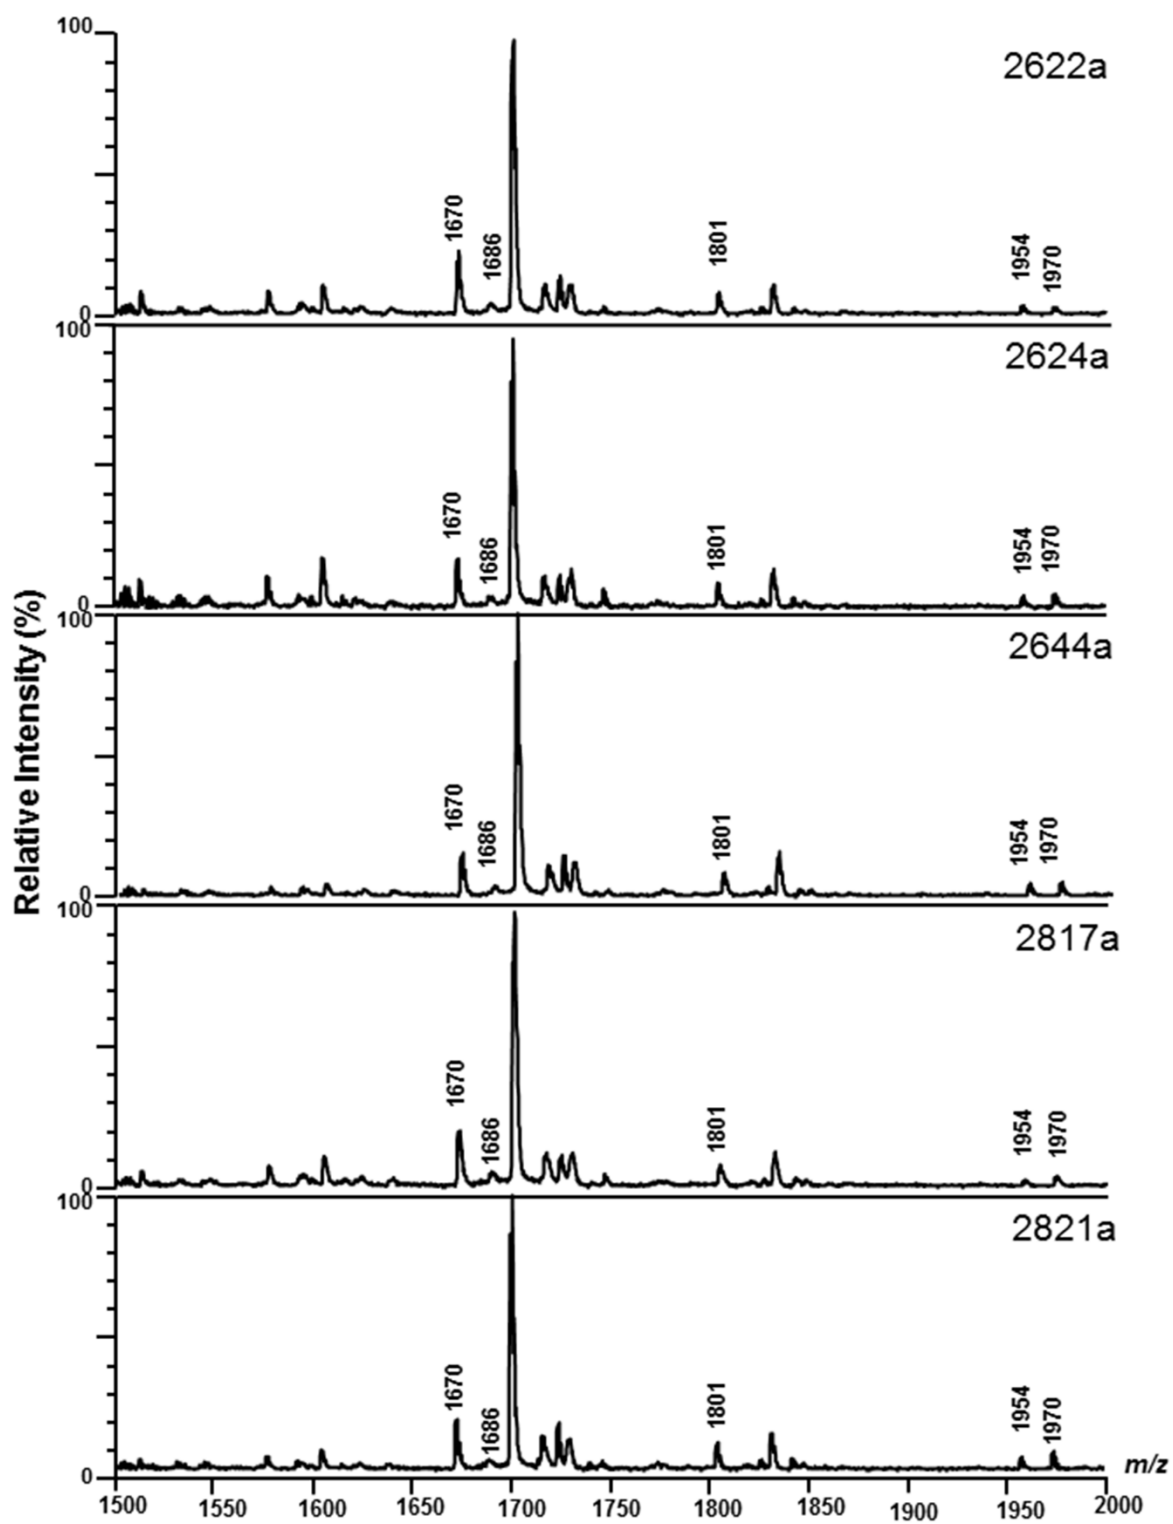

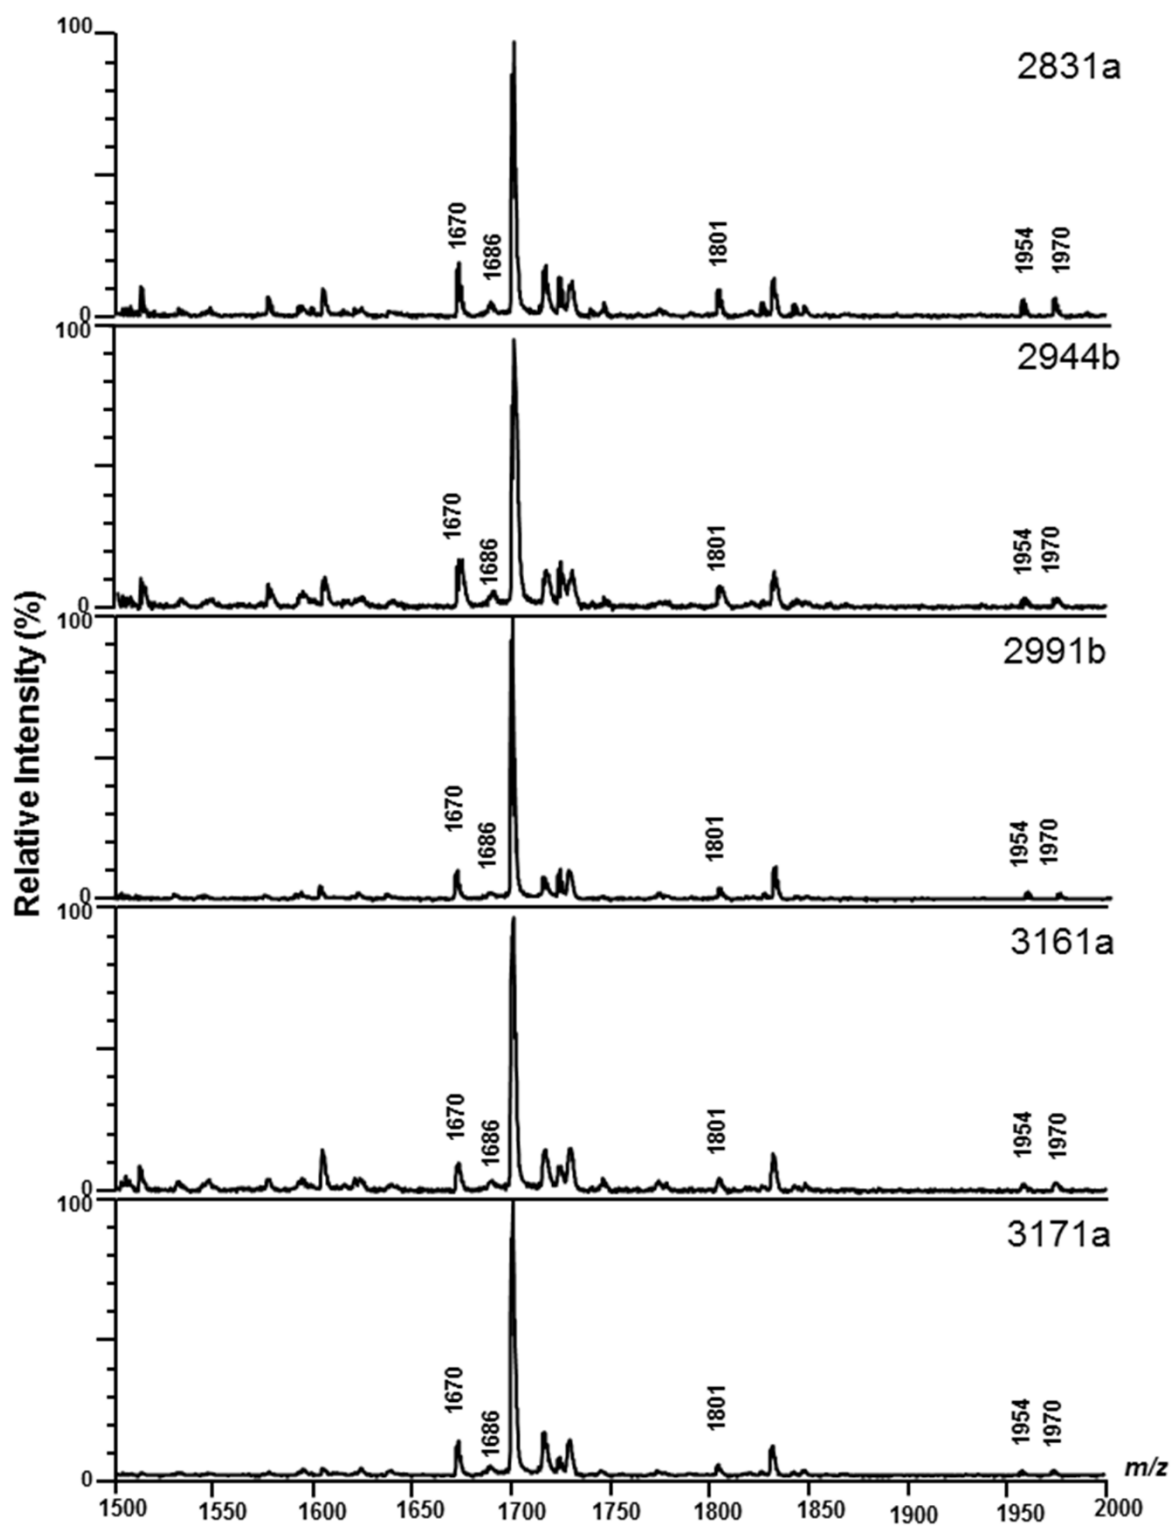

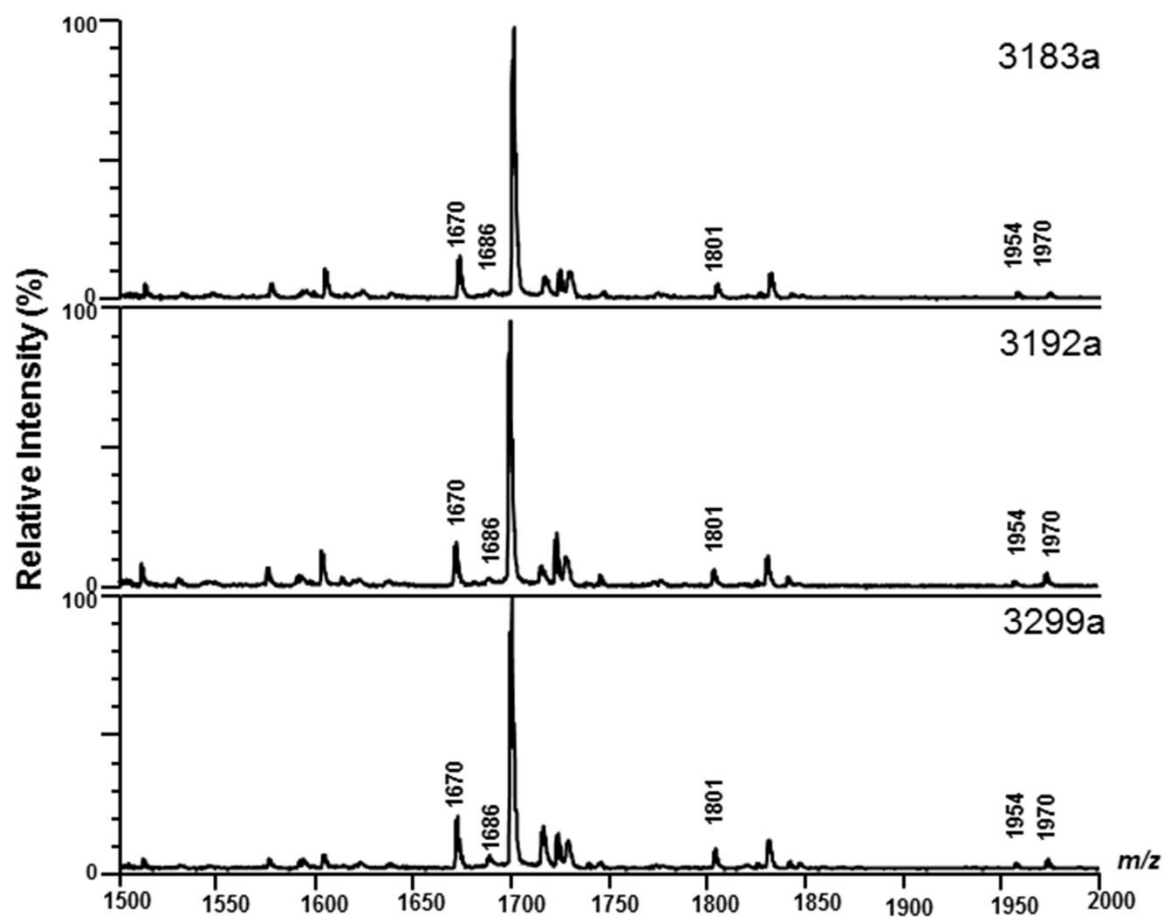

Supplement: pntd.0006287.s002.pdf [file pntd.0006287.s002.pdf]
