# Supplementary material for: Comprehensive analysis of clinical Burkholderia pseudomallei isolates demonstrates conservation of unique lipid A structure and TLR4-dependent innate immune activation
Source: PubMed Central journal article supplement (PMC5842036; doi:10.1371/journal.pntd.0006287), 2018-02-23

S4 Fig. MALDI-TOF lipid A spectra of 35 individual colonies of *B. pseudomallei* from 7 clinical specimens (5 colonies for each specimens) from a Thai patient with acute melioidosis

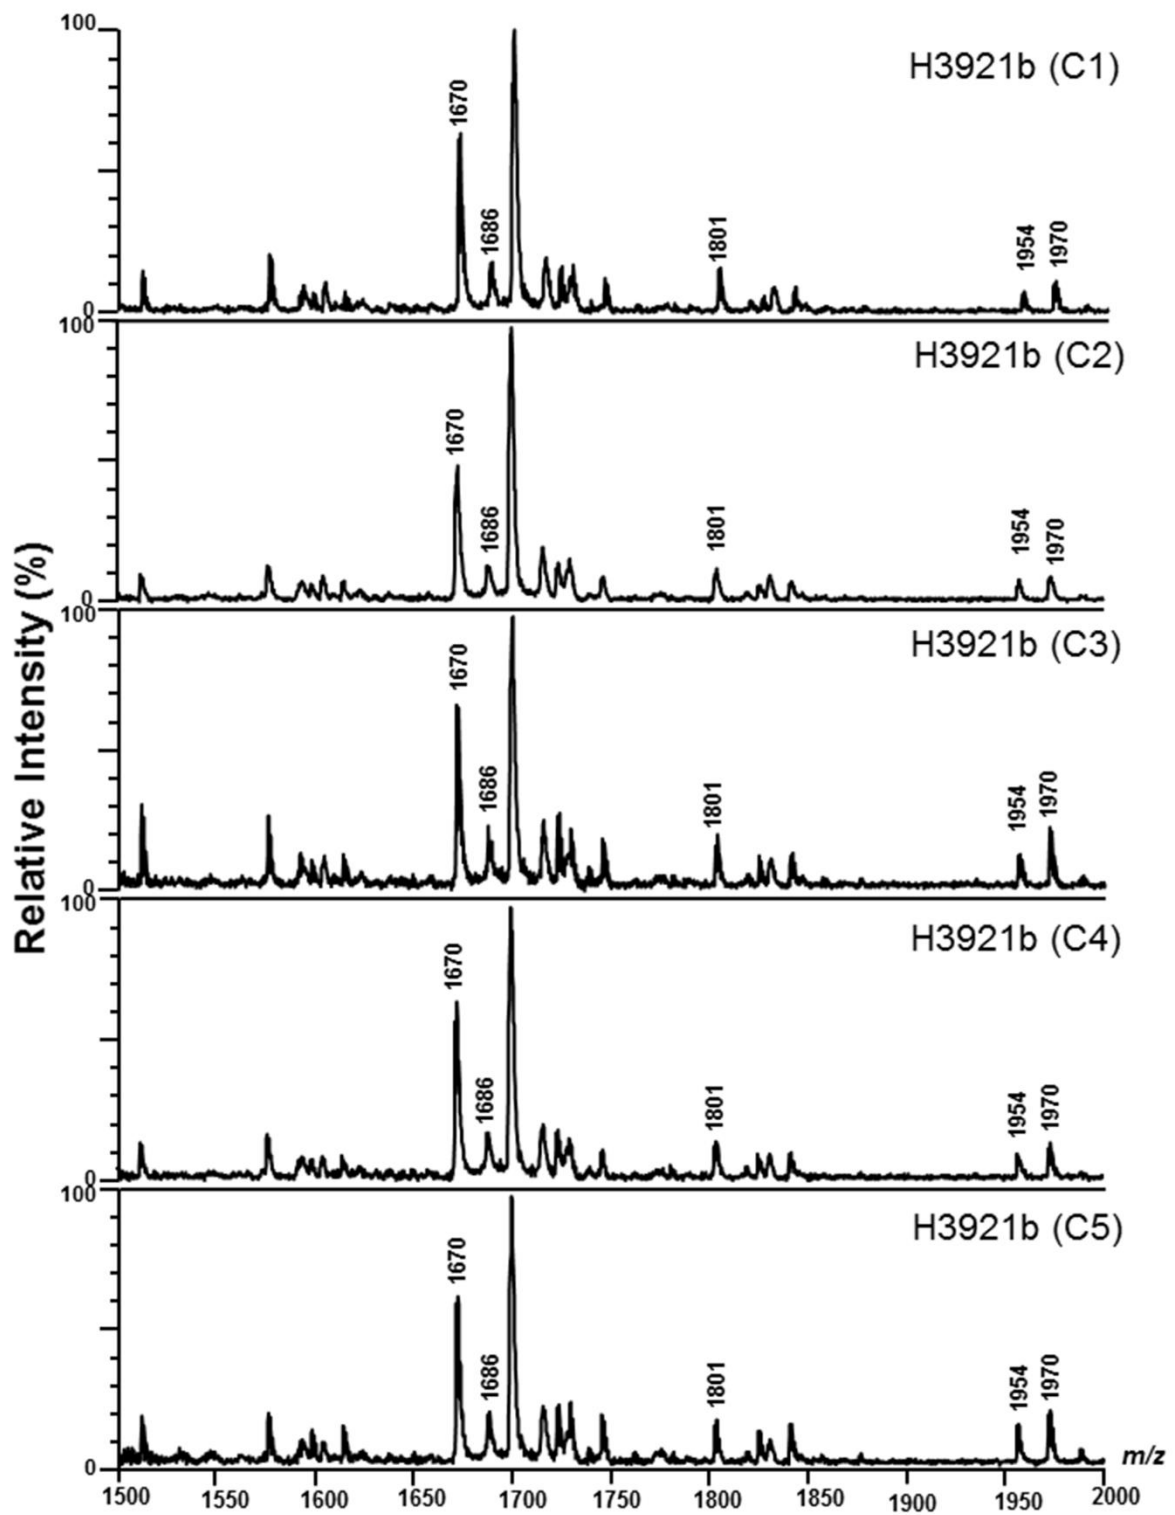

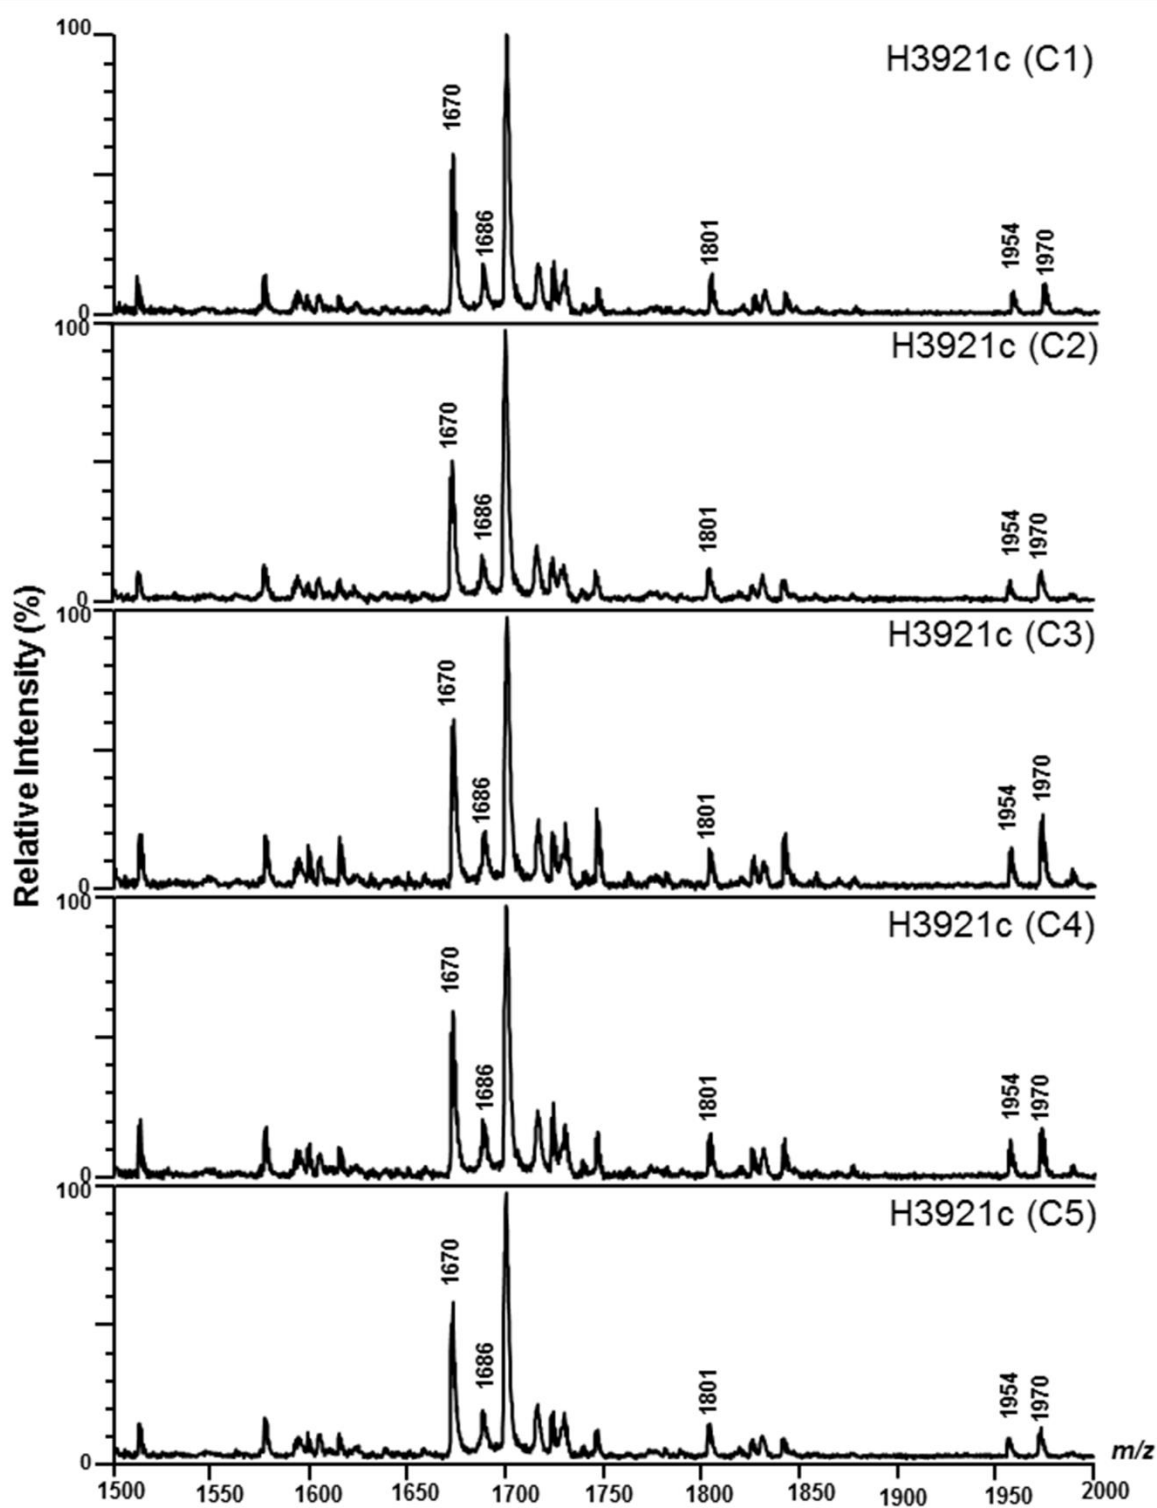

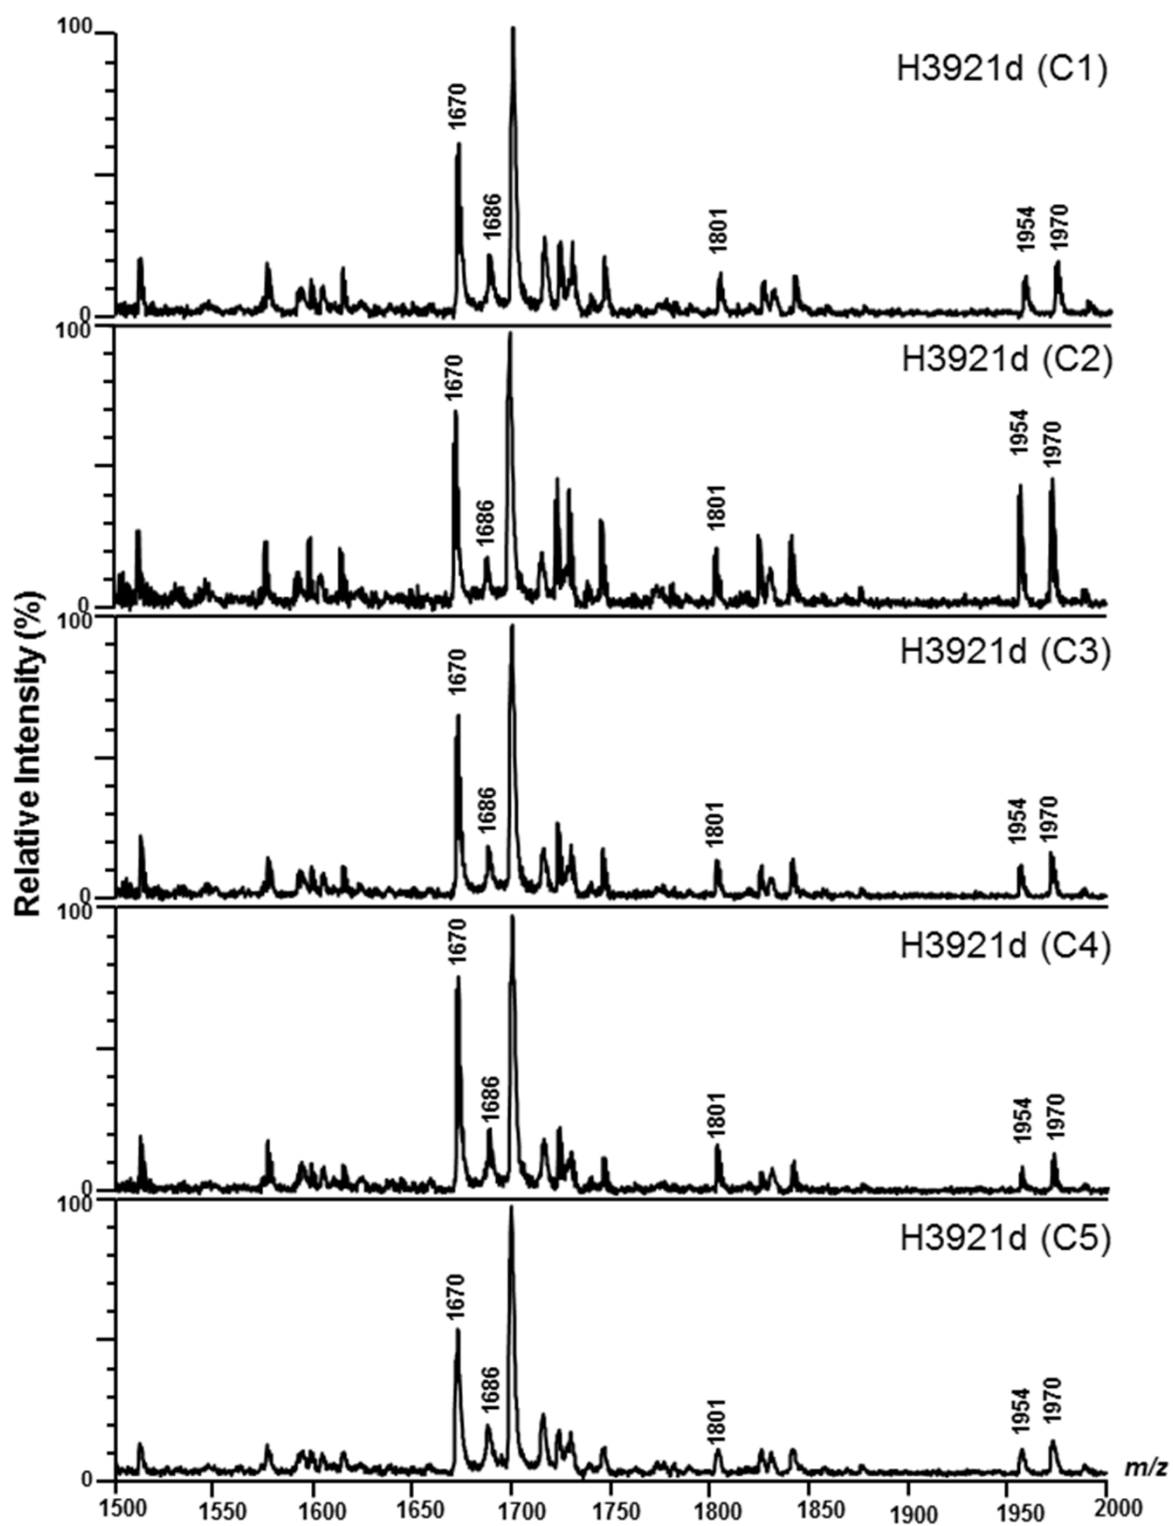

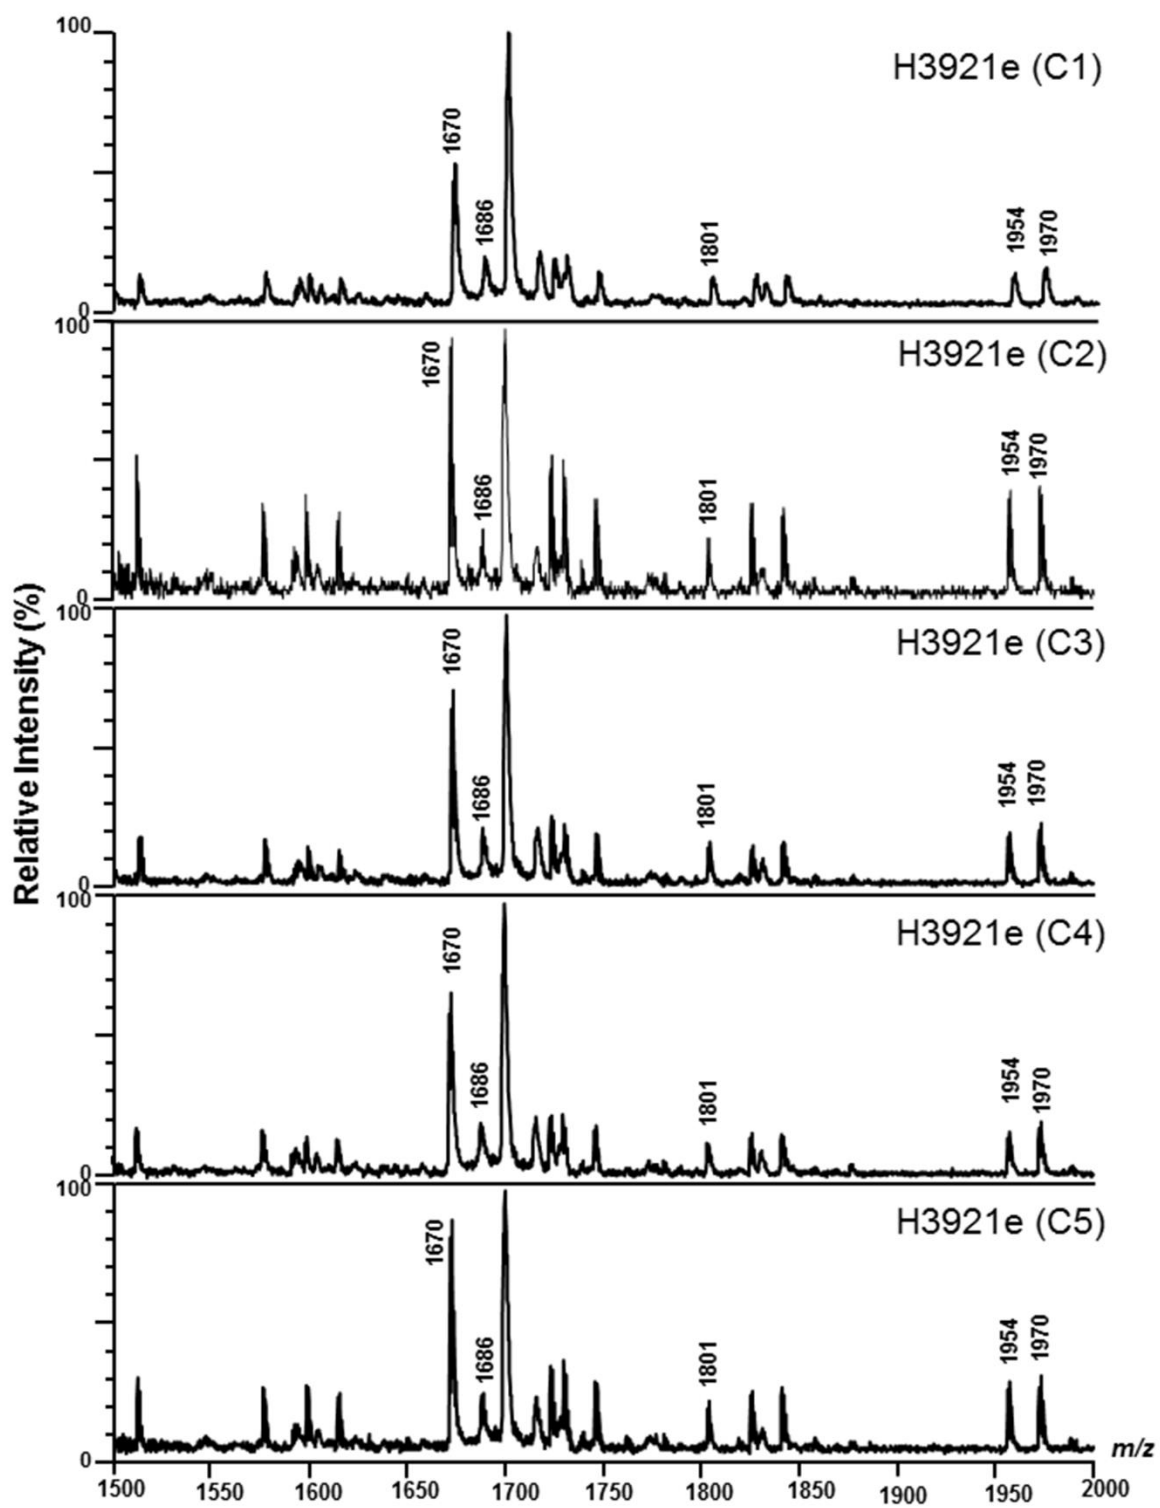

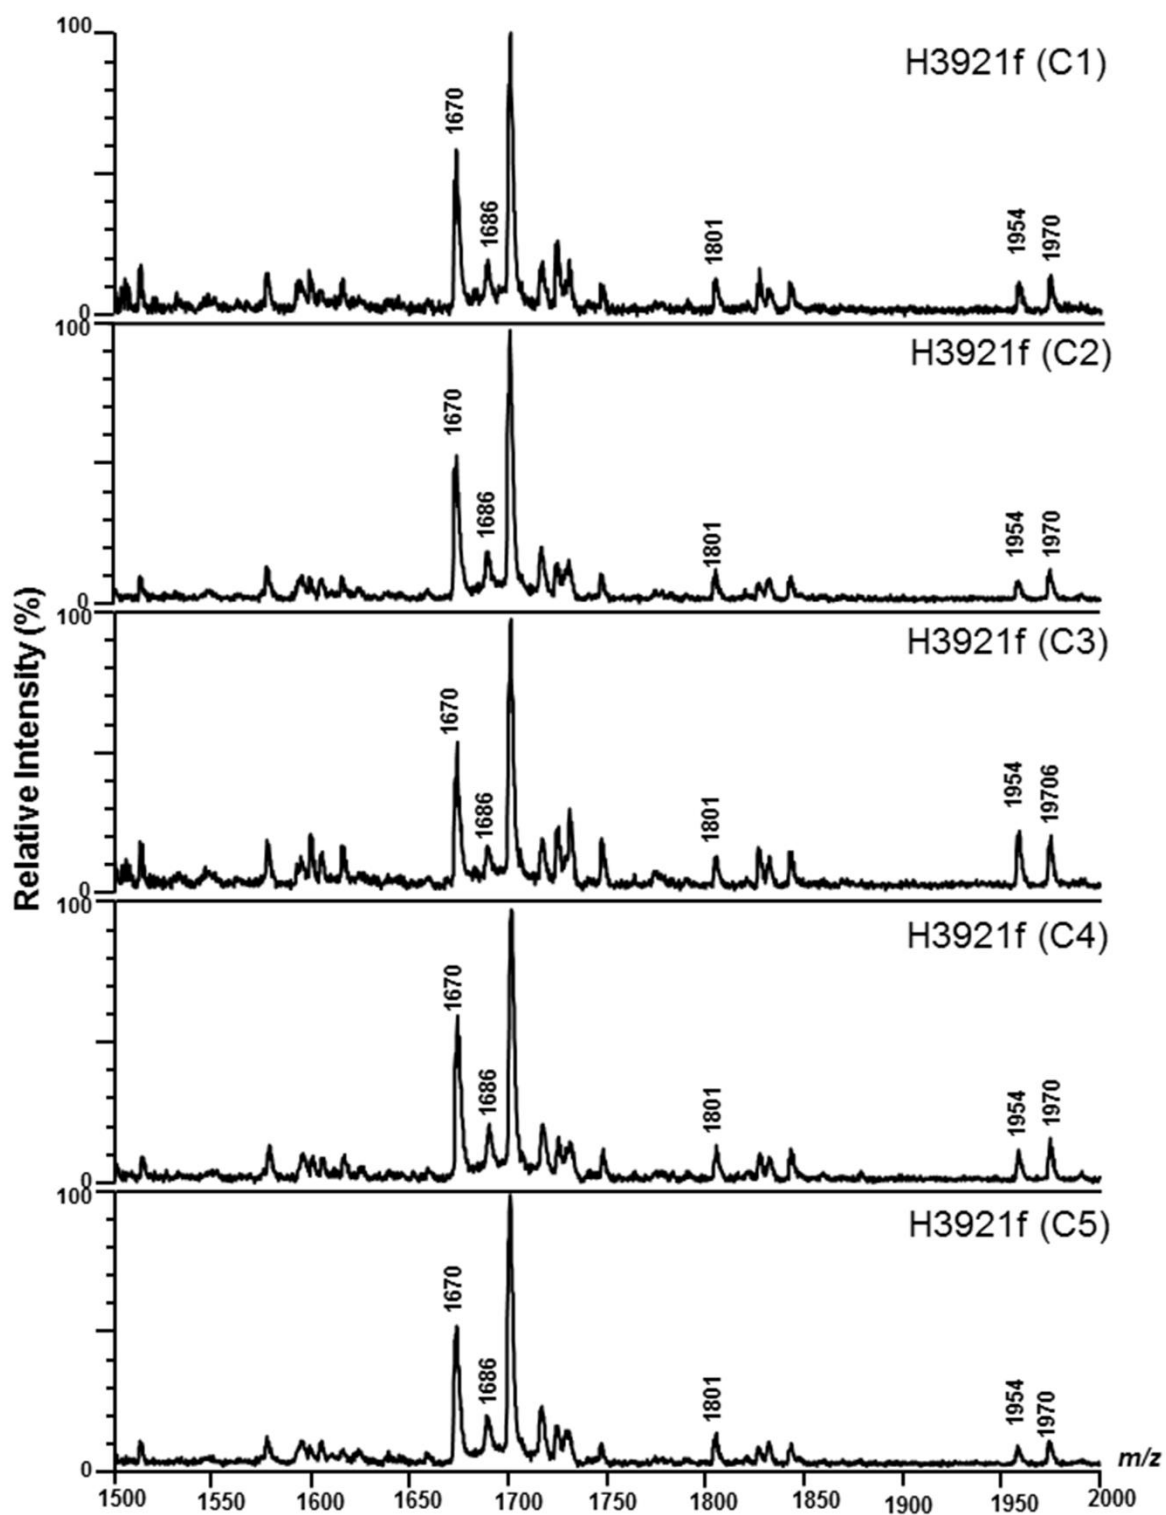

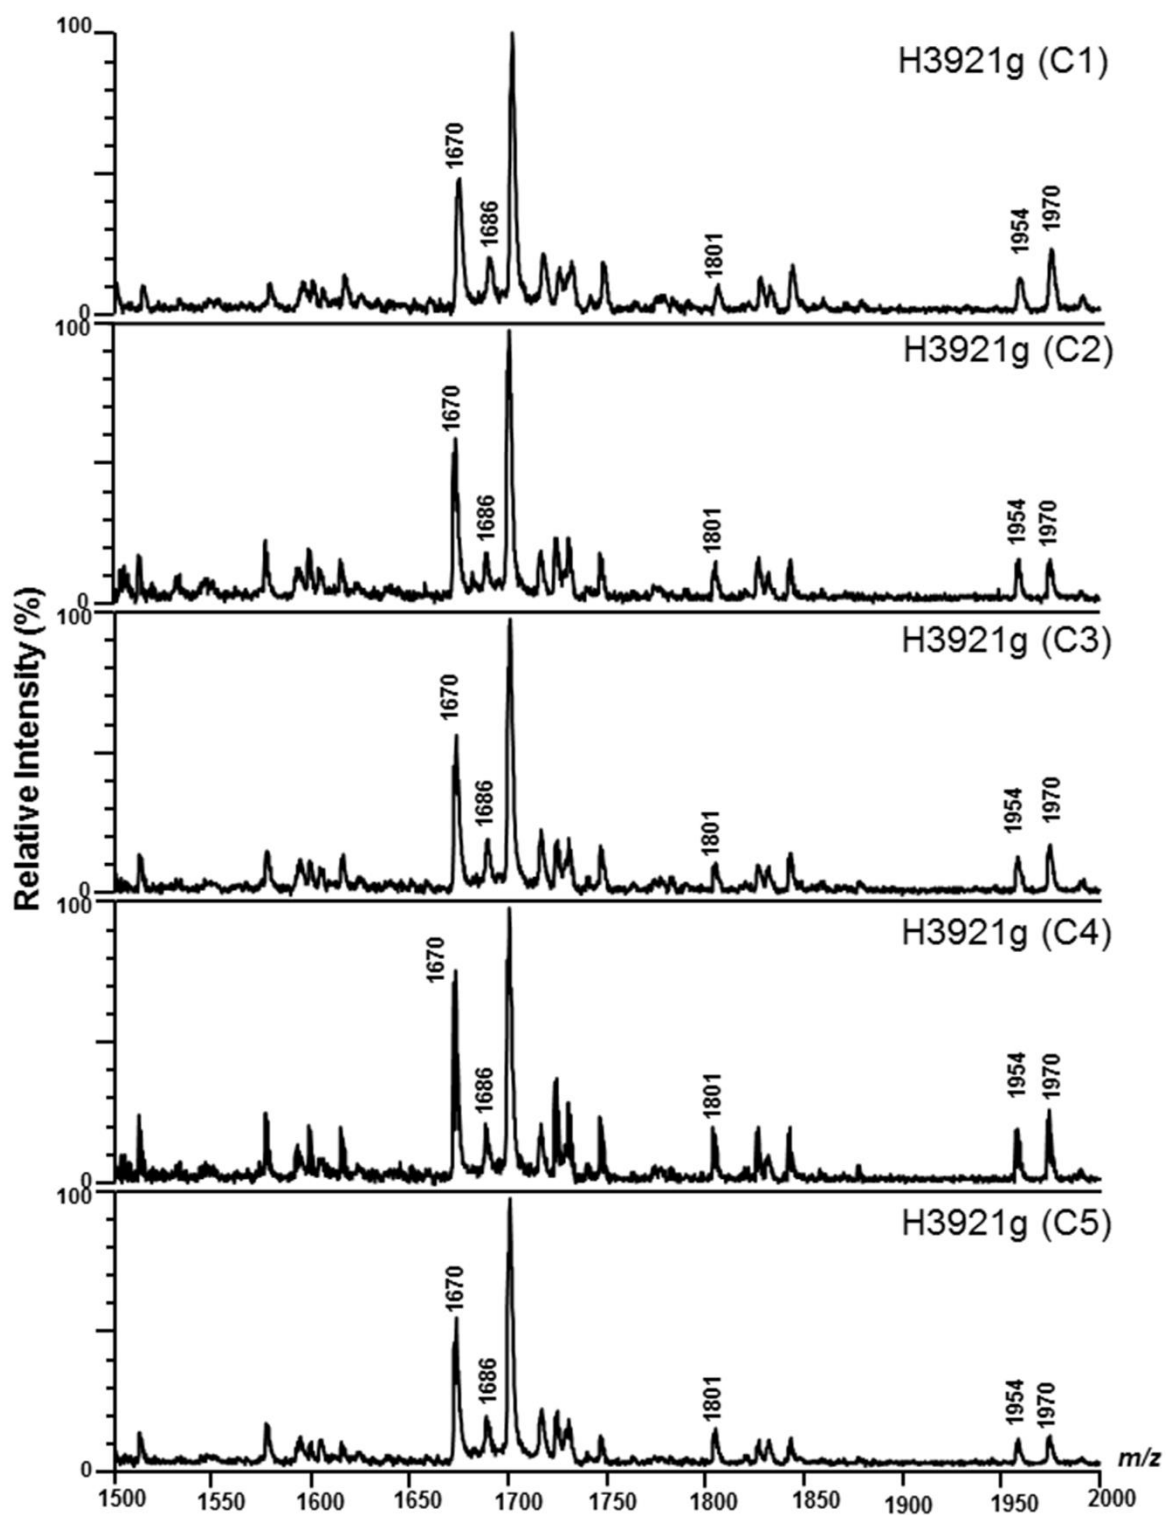

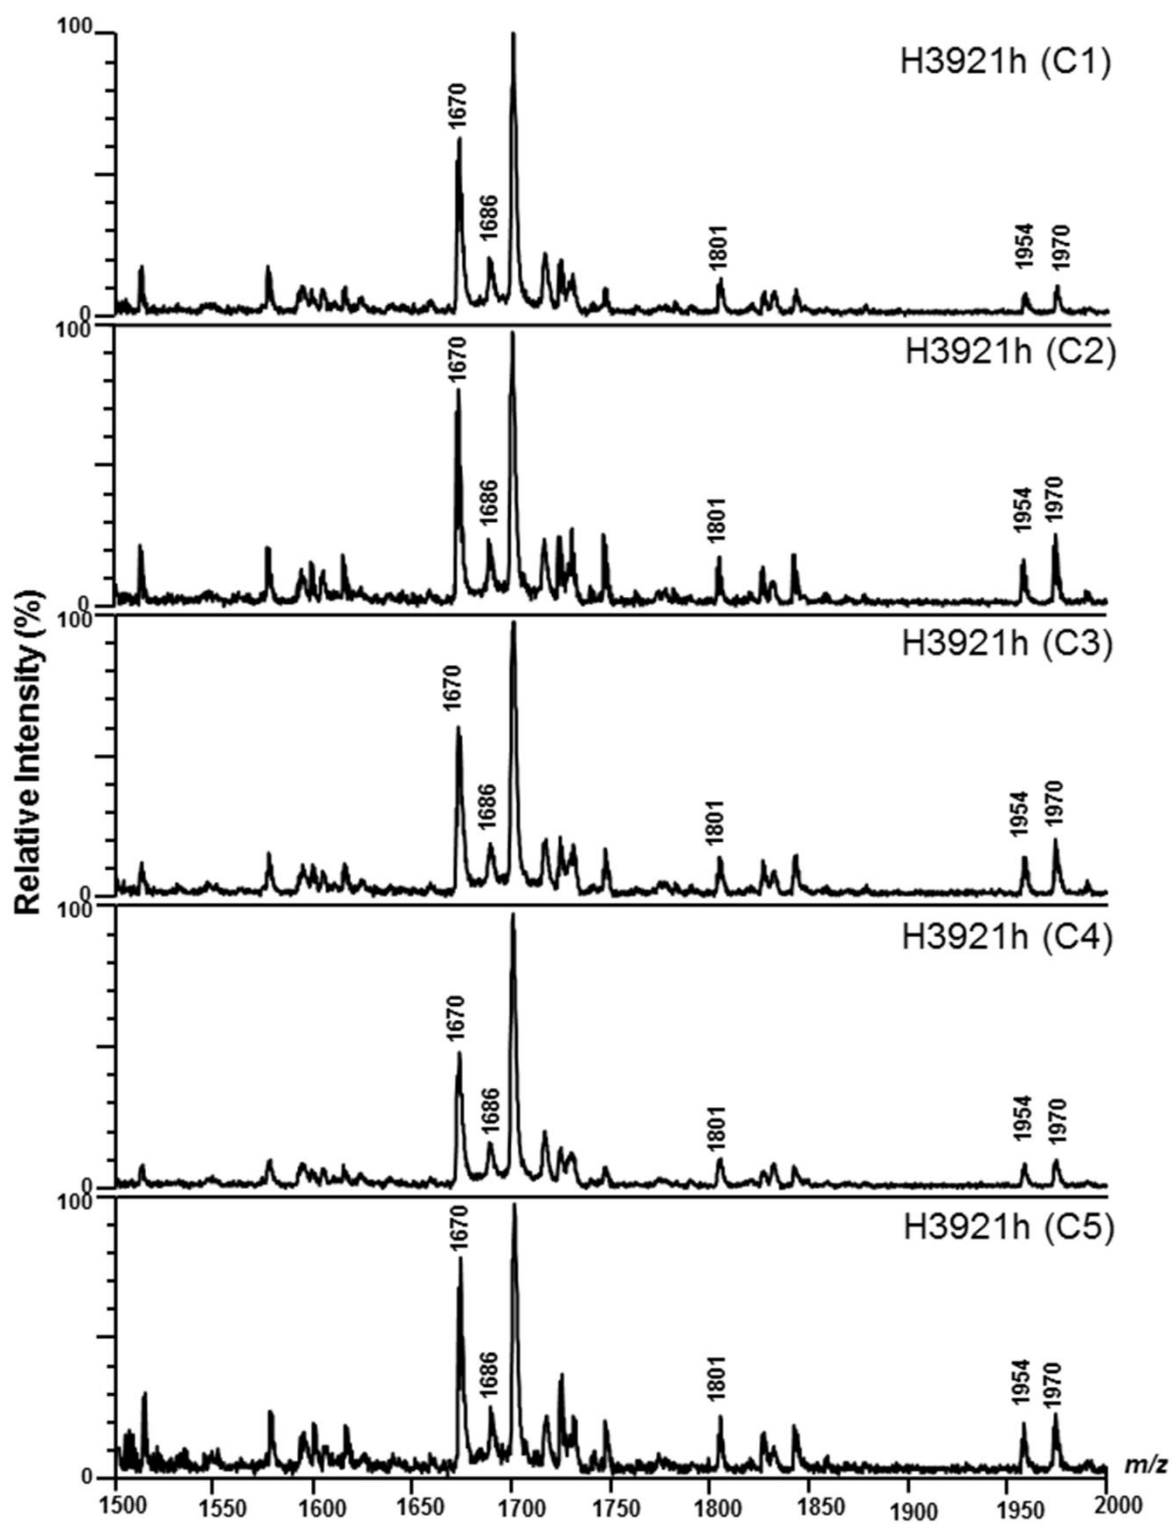

Supplement: pntd.0006287.s004.pdf [file pntd.0006287.s004.pdf]
