# Supplementary material for: Comprehensive analysis of clinical Burkholderia pseudomallei isolates demonstrates conservation of unique lipid A structure and TLR4-dependent innate immune activation
Source: PubMed Central journal article supplement (PMC5842036; doi:10.1371/journal.pntd.0006287), 2018-02-23

S5 Fig. MALDI-TOF lipid A spectra of clinical isolates of *B. pseudomallei* strain K96243 cultured in different laboratory conditions

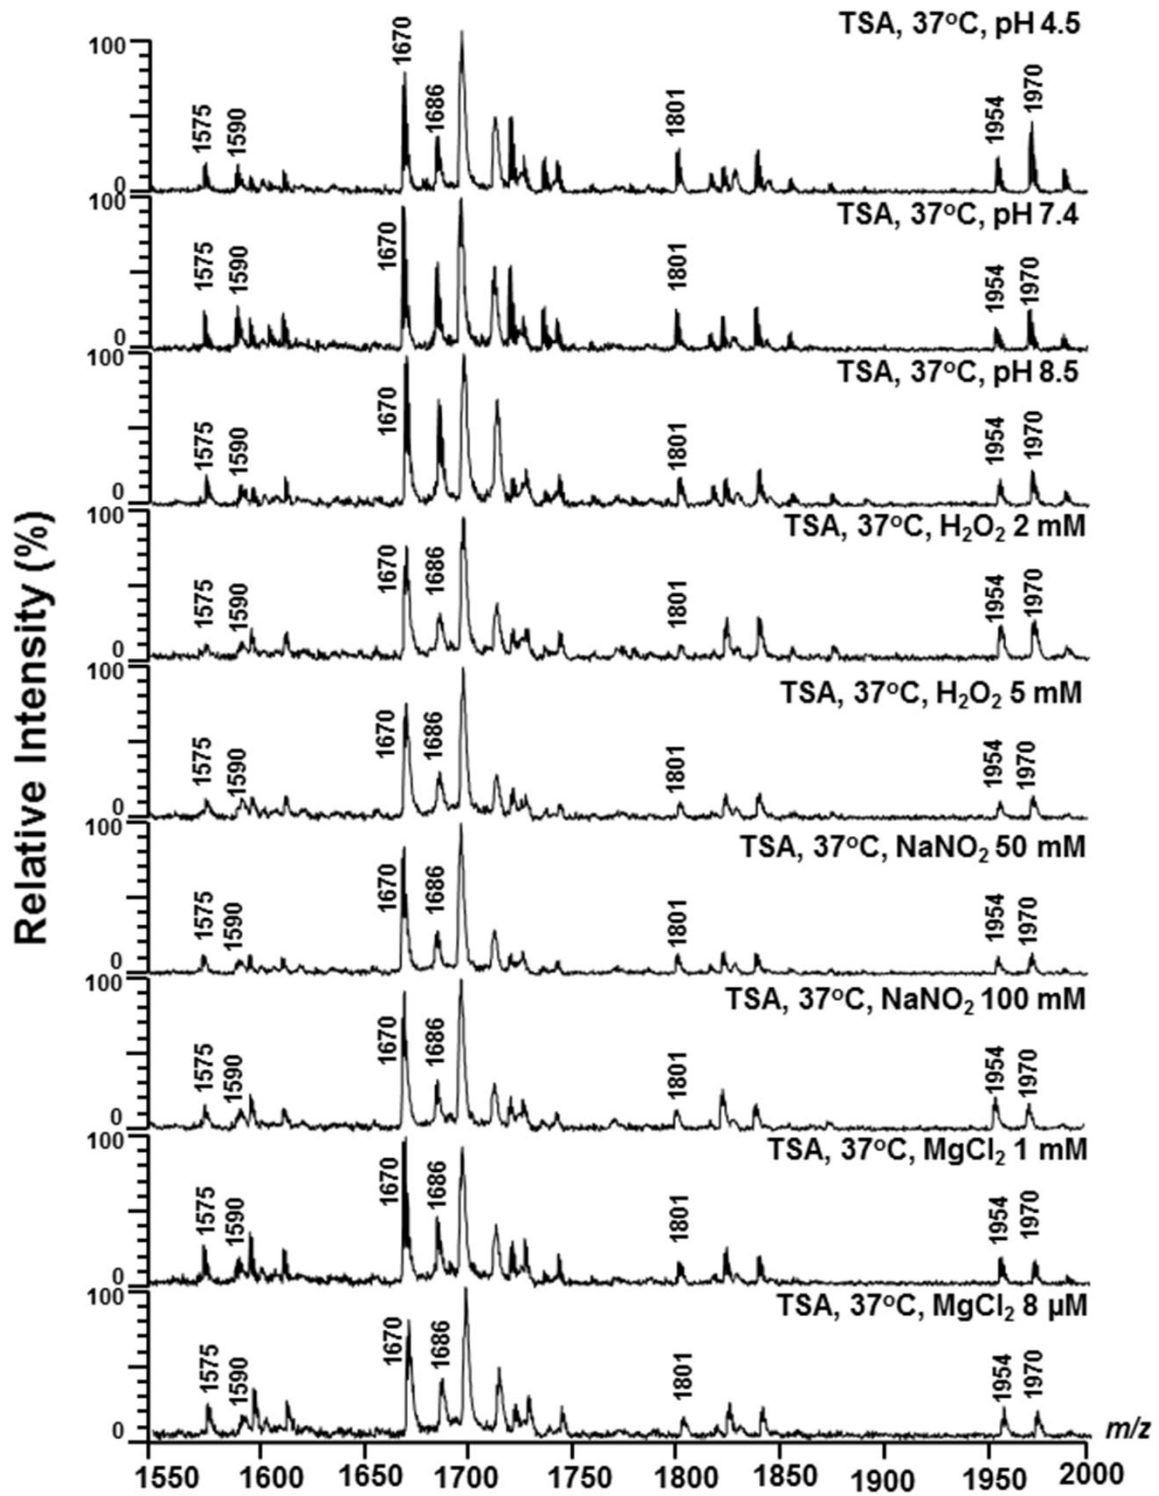

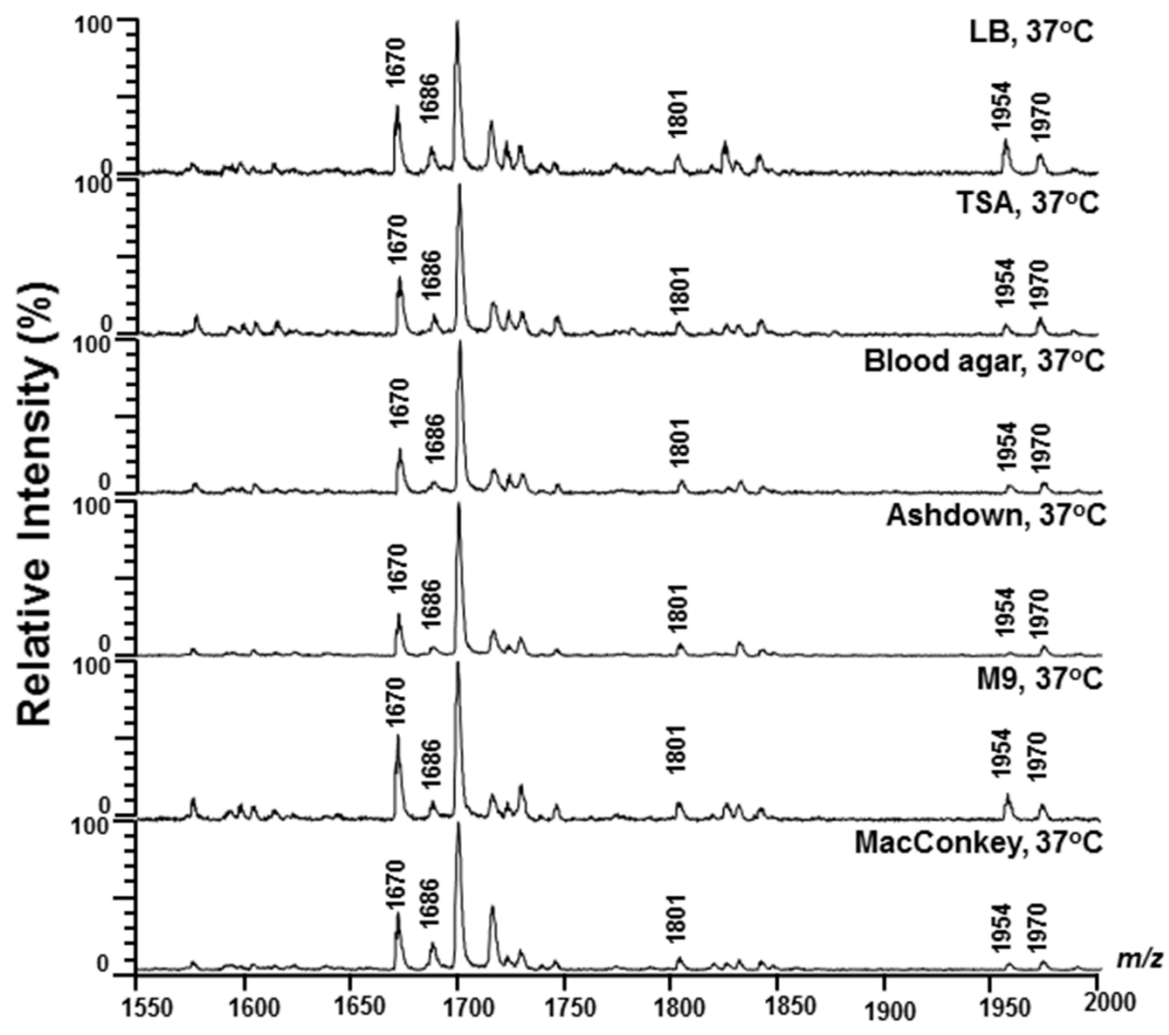

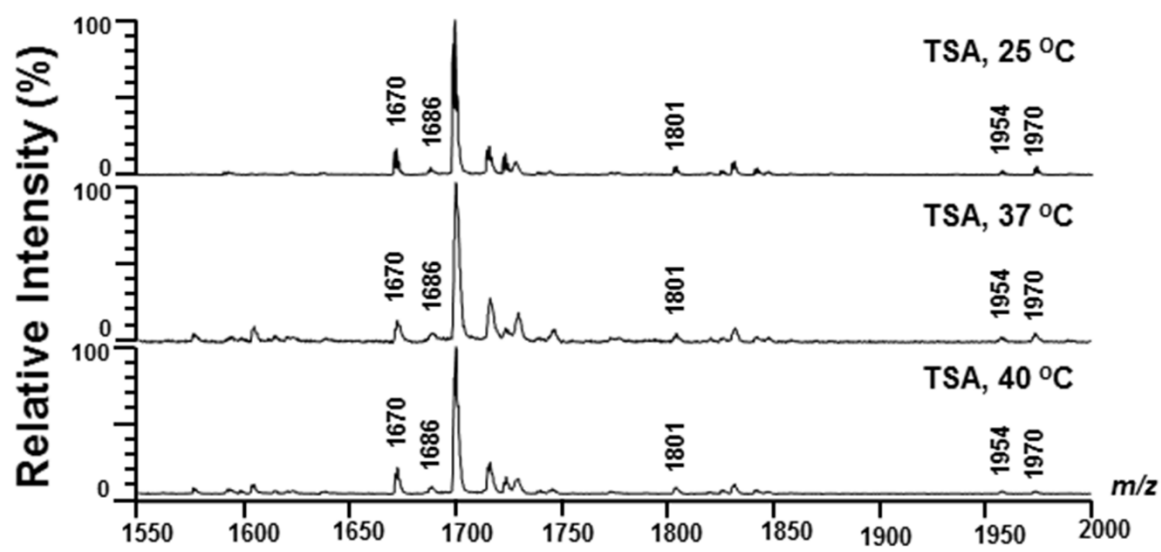

Supplement: pntd.0006287.s005.pdf [file pntd.0006287.s005.pdf]
