# Supplementary material for: Comprehensive analysis of clinical Burkholderia pseudomallei isolates demonstrates conservation of unique lipid A structure and TLR4-dependent innate immune activation
Source: PubMed Central journal article supplement (PMC5842036; doi:10.1371/journal.pntd.0006287), 2018-02-23

S6 Fig. MALDI-TOF lipid A spectra of *B. pseudomallei* K96243 and *B. pseudomallei* K96243  $\Delta wbiD$

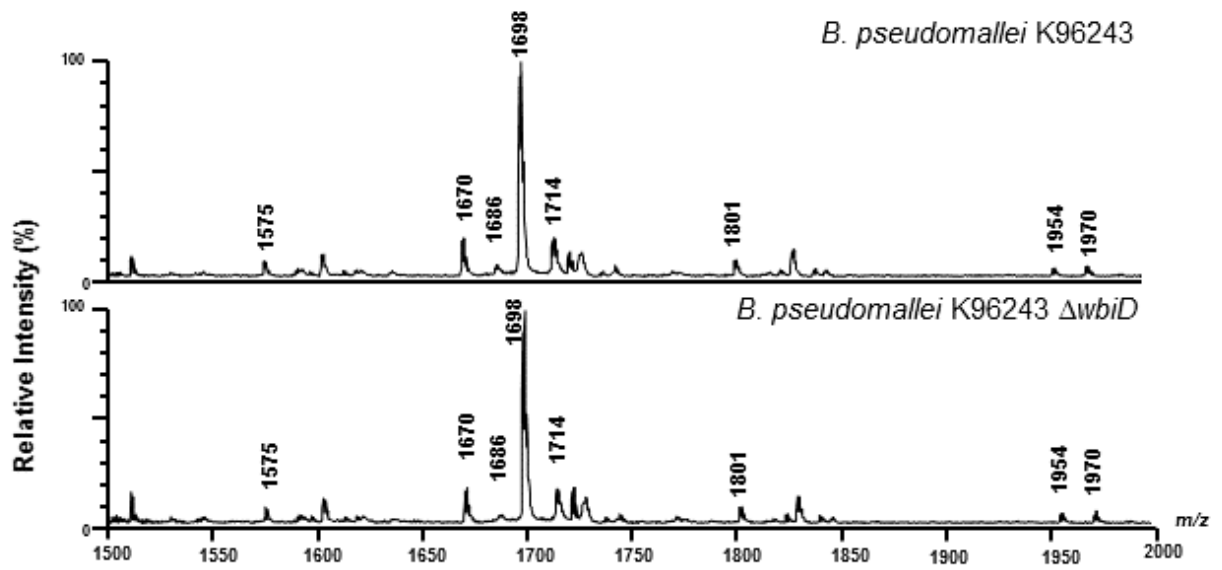

Supplement: pntd.0006287.s006.pdf [file pntd.0006287.s006.pdf]
