# Supplementary material for: Comprehensive analysis of clinical Burkholderia pseudomallei isolates demonstrates conservation of unique lipid A structure and TLR4-dependent innate immune activation
Source: PubMed Central journal article supplement (PMC5842036; doi:10.1371/journal.pntd.0006287), 2018-02-23
Supplement: pntd.0006287.s007.pdf [file pntd.0006287.s007.pdf]

**S1 Table. *B. pseudomallei* wild type and mutant strains used in this study**

| Strain               | Characteristic                           | LPS type | Reference |
|----------------------|------------------------------------------|----------|-----------|
| K96243               | Wild type                                | A        | [1]       |
| K96243 $\Delta wbiD$ | Mutant defective in OPS synthesis        | Rough    | [2]       |
| K96243 $\Delta wbiA$ | Mutant defective in acetylation of OPS   | A        | [2]       |
| K96243 $\Delta oacA$ | Mutant defective in acetylation of OPS   | A        | [2]       |
| 4095a                | Clinical strain from melioidosis patient | A        | [2]       |
| 4095a $\Delta wcbB$  | Mutant defective in CPS synthesis        | A        | [2]       |

1. Holden MT, Titball RW, Peacock SJ, Cerdeno-Tarraga AM, Atkins T, Crossman LC, et al. Genomic plasticity of the causative agent of melioidosis, *Burkholderia pseudomallei*. Proceedings of the National Academy of Sciences of the United States of America. 2004;101(39):14240-5. doi: 10.1073/pnas.0403302101.
2. Wikraiphat C, Saiprom N, Tandhavanant S, Heiss C, Azadi P, Wongsuvan G, et al. Colony morphology variation of *Burkholderia pseudomallei* is associated with antigenic variation and O-polysaccharide modification. Infection and immunity. 2015;83(5):2127-38. doi: 10.1128/IAI.02785-14.
