# Supplementary material for: Comprehensive analysis of clinical Burkholderia pseudomallei isolates demonstrates conservation of unique lipid A structure and TLR4-dependent innate immune activation
Source: PubMed Central journal article supplement (PMC5842036; doi:10.1371/journal.pntd.0006287), 2018-02-23
Supplement: pntd.0006287.s008.pdf [file pntd.0006287.s008.pdf]

**S2 Table. Clinical isolates of *B. pseudomallei* from 68 Thai patients with episode of relapse and date of isolation and specimen types**

| Patient No. | Primary |                   |                | Relapse |                   |                  |
|-------------|---------|-------------------|----------------|---------|-------------------|------------------|
|             | Strain  | Date of isolation | Specimen type  | Strain  | Date of isolation | Specimen type    |
| 1           | 206a    | 22-Oct-1986       | Blood          | 242a    | 15-May-1987       | Blood            |
| 2           | 226a    | 19-Dec-1986       | Wound swab     | 240a    | 28-Apr-1987       | Blood            |
| 3           | 257a    | 2-Jul-1987        | Pus            | 257c    | 14-Oct-1997       | Pus              |
| 4           | 303b    | 26-Aug-1987       | Blood          | 303d    | 2-Nov-1987        | Blood            |
| 5           | 423a    | 4-Oct-1988        | Blood          | 423g    | 15-Mar-1989       | Blood            |
| 6           | 428a    | 18-Oct-1988       | Sputum         | 428g    | 19-Jan-1989       | Pus              |
| 7           | 430e    | 22-Oct-1988       | Blood          | 454a    | 24-Jan-1989       | Blood            |
| 8           | 436b    | 2-Nov-1988        | Blood          | 436e    | 31-May-1989       | Splenic aspirate |
| 9           | 443a    | 10-Dec-1988       | Pleural fluid  | 443d    | 23-Jun-1989       | Pleural fluid    |
| 10          | 448a    | 20-Dec-1988       | Blood          | 448c    | 4-Jan-1989        | Blood            |
| 11          | 479a    | 8-Jun-1989        | Sputum         | 479e    | 6-Oct-1989        | Sputum           |
| 12          | 480a    | 7-Jun-1989        | Lung           | 480c    | 2-Sep-1990        | Pleural fluid    |
| 13          | 504a    | 16-Jul-1989       | Blood          | 504d    | 24-Sep-1989       | Blood            |
| 14          | 596a    | 27-Oct-1989       | Blood          | 596c    | 7-Mar-1990        | Wound swab       |
| 15          | 646a    | 3-May-1990        | Sputum         | 646b    | 3-Jun-1990        | Sputum           |
| 16          | 757a    | 11-Dec-1990       | Liver aspirate | 757c    | 5-May-1995        | Blood            |
| 17          | 763a    | 5-Jan-1991        | Pleural fluid  | 763b    | 1-May-1991        | Sputum           |
| 18          | 770b    | 25-Jan-1991       | Sputum         | 770c    | 26-Nov-1991       | Sputum           |
| 19          | 845a    | 8-Sep-1991        | Rectal swab    | 845d    | 15-Jan-1992       | Blood            |
| 20          | 855e    | 5-Oct-1991        | Rectal swab    | 855h    | 22-Apr-1994       | Wound swab       |
| 21          | 1066a   | 15-Jul-1993       | Liver aspirate | 1066b   | 23-Aug-1996       | Synovial fluid   |
| 22          | 1119a   | 14-Sep-1993       | Pleural fluid  | 1119d   | 5-Dec-1993        | Wound swab       |
| 23          | 1143a   | 8-Oct-1993        | Liver aspirate | 1143c   | 20-Jul-2001       | Splenic aspirate |
| 24          | 1165a   | 30-Oct-1993       | Sputum         | 1165b   | 18-Dec-1993       | Sputum           |
| 25          | 1189a   | 15-Jan-1994       | Liver aspirate | 1189b   | 27-Sep-1995       | Liver aspirate   |

|    |       |             |                  |       |             |                |
|----|-------|-------------|------------------|-------|-------------|----------------|
| 26 | 1210a | 7-May-1994  | Blood            | 1210c | 23-Dec-1994 | Blood          |
| 27 | 1219a | 26-May-1994 | Wound swab       | 1219b | 18-Oct-1994 | Urine          |
| 28 | 1234a | 30-Jun-1994 | Urine            | 1234b | 7-Jan-1995  | Urine          |
| 29 | 1237a | 1-Jul-1994  | Blood            | 1237d | 5-Aug-1994  | Sputum         |
| 30 | 1303b | 8-Oct-1994  | Blood            | 1303d | 28-Nov-1994 | Pus            |
| 31 | 1304a | 11-Oct-1994 | Liver aspirate   | 1304b | 16-Dec-1994 | Liver aspirate |
| 32 | 1338a | 18-Dec-1994 | Liver aspirate   | 1338c | 20-Dec-1997 | Blood          |
| 33 | 1400b | 16-Jul-1995 | Blood            | 1400e | 27-Jun-1996 | Blood          |
| 34 | 1401a | 12-Jul-1995 | Blood            | 1401b | 11-Aug-1995 | Blood          |
| 35 | 1463a | 4-Sep-1995  | Blood            | 1463b | 27-Feb-1996 | Blood          |
| 36 | 1479a | 21-Sep-1995 | Urine            | 1479b | 28-Jun-2001 | Urine          |
| 37 | 1494a | 13-Oct-1995 | Wound swab       | 1494e | 16-Aug-1996 | Blood          |
| 38 | 1495a | 13-Oct-1995 | Splenic aspirate | 1495b | 12-Jun-1999 | Wound swab     |
| 39 | 1501a | 28-Oct-1995 | Wound swab       | 1501c | 4-May-1999  | Pus            |
| 40 | 1577a | 3-Jul-1996  | Sputum           | 1577b | 18-Mar-1997 | Blood          |
| 41 | 1620a | 5-Sep-1996  | Blood            | 1620d | 21-Jan-1998 | Pus            |
| 42 | 1628b | 20-Sep-1996 | Blood            | 1628c | 22-Aug-0202 | Blood          |
| 43 | 1634a | 20-Sep-1996 | Blood            | 1634b | 5-Mar-1999  | Blood          |
| 44 | 1660a | 18-Oct-1996 | Pleural fluid    | 1660c | 10-Apr-2001 | Pleural fluid  |
| 45 | 1686a | 13-Nov-1996 | Blood            | 1686b | 22-Feb-1997 | Urine          |
| 46 | 1690a | 22-Nov-1996 | Blood            | 1690c | 3-Jun-1999  | Blood          |
| 47 | 1698a | 12-Dec-1996 | Liver aspirate   | 1698b | 3-Feb-1997  | Liver aspirate |
| 48 | 1699a | 13-Dec-1996 | Pus              | 1699b | 9-Oct-1997  | Pus            |
| 49 | 1790a | 25-Jul-1997 | Throat swab      | 1790b | 23-Aug-1997 | Sputum         |
| 50 | 1897a | 18-Dec-1997 | Blood            | 1897d | 20-Mar-1998 | Blood          |
| 51 | 1923a | 18-Mar-1998 | Sputum           | 1923b | 28-Jul-1998 | Sputum         |
| 52 | 2029b | 7-Aug-1998  | Blood            | 2029e | 27-Aug-1999 | Blood          |
| 53 | 2033a | 7-Aug-1998  | Wound swab       | 2033c | 2-Sep-1998  | Wound swab     |
| 54 | 2310a | 16-Jul-1999 | Blood            | 2310c | 23-Jul-2002 | Blood          |
| 55 | 2507a | 23-Jul-2000 | Pus              | 2507d | 22-May-2002 | Liver aspirate |

|    |       |             |                  |       |             |            |
|----|-------|-------------|------------------|-------|-------------|------------|
| 56 | 2622a | 27-Feb-2001 | Blood            | 2622e | 9-Dec-2002  | Blood      |
| 57 | 2624a | 6-Mar-2001  | Blood            | 2624b | 6-Aug-2002  | Wound swab |
| 58 | 2644a | 27-May-2001 | Blood            | 2644e | 9-Jun-2002  | Blood      |
| 59 | 2817a | 25-May-2002 | Blood            | 2817b | 11-Jul-2002 | Blood      |
| 60 | 2821a | 30-May-2002 | Blood            | 2821b | 16-Aug-2002 | Urine      |
| 61 | 2831a | 19-Jun-2002 | Sputum           | 2831b | 16-Jul-2002 | Sputum     |
| 62 | 2944b | 15-Oct-2002 | Blood            | 2944d | 23-Dec-2002 | Blood      |
| 63 | 2991b | 31-May-2003 | Blood            | 2991d | 12-Mar-2004 | Blood      |
| 64 | 3161a | 7-Oct-2003  | Wound swab       | 3161b | 18-Nov-2004 | Wound swab |
| 65 | 3171a | 14-Oct-2003 | Blood            | 3171e | 23-Jun-2004 | Blood      |
| 66 | 3183a | 25-Oct-2003 | Splenic aspirate | 3183b | 28-Sep-2004 | Blood      |
| 67 | 3192a | 8-Nov-2003  | Blood            | 3192b | 10-Nov-2005 | Blood      |
| 68 | 3299a | 26-Jun-2004 | Lung             | 3299b | 10-Jan-2005 | Sputum     |

---
