# Supplementary material for: Comprehensive analysis of clinical Burkholderia pseudomallei isolates demonstrates conservation of unique lipid A structure and TLR4-dependent innate immune activation
Source: PubMed Central journal article supplement (PMC5842036; doi:10.1371/journal.pntd.0006287), 2018-02-23
Supplement: pntd.0006287.s009.pdf [file pntd.0006287.s009.pdf]

**S3 Table. Clinical isolates of *B. pseudomallei* from 35 individual colonies of 7 clinical specimens used in this study**

| Colony No. | Strain | Date of isolation | Specimen type      |
|------------|--------|-------------------|--------------------|
| 1          | H3921b | 17-Jul-2006       |                    |
| 2          | H3921b | 17-Jul-2006       |                    |
| 3          | H3921b | 17-Jul-2006       | Blood              |
| 4          | H3921b | 17-Jul-2006       |                    |
| 5          | H3921b | 17-Jul-2006       |                    |
| 1          | H3921e | 17-Jul-2006       |                    |
| 2          | H3921e | 17-Jul-2006       |                    |
| 3          | H3921e | 17-Jul-2006       | tracheal suction   |
| 4          | H3921e | 17-Jul-2006       |                    |
| 5          | H3921e | 17-Jul-2006       |                    |
| 1          | H3921d | 17-Jul-2006       |                    |
| 2          | H3921d | 17-Jul-2006       |                    |
| 3          | H3921d | 17-Jul-2006       | urine              |
| 4          | H3921d | 17-Jul-2006       |                    |
| 5          | H3921d | 17-Jul-2006       |                    |
| 1          | H3921g | 17-Jul-2006       |                    |
| 2          | H3921g | 17-Jul-2006       |                    |
| 3          | H3921g | 17-Jul-2006       | pus from right leg |
| 4          | H3921g | 17-Jul-2006       |                    |
| 5          | H3921g | 17-Jul-2006       |                    |
| 1          | H3921f | 17-Jul-2006       |                    |
| 2          | H3921f | 17-Jul-2006       | pus from left leg  |
| 3          | H3921f | 17-Jul-2006       |                    |
| 4          | H3921f | 17-Jul-2006       |                    |
| 5          | H3921f | 17-Jul-2006       |                    |

---

|   |        |             |                   |
|---|--------|-------------|-------------------|
| 1 | H3921c | 17-Jul-2006 |                   |
| 2 | H3921c | 17-Jul-2006 |                   |
| 3 | H3921c | 17-Jul-2006 | pus from forehead |
| 4 | H3921c | 17-Jul-2006 |                   |
| 5 | H3921c | 17-Jul-2006 |                   |

---

|   |        |             |                       |
|---|--------|-------------|-----------------------|
| 1 | H3921h | 18-Jul-2006 |                       |
| 2 | H3921h | 18-Jul-2006 |                       |
| 3 | H3921h | 18-Jul-2006 | wound swab from thigh |
| 4 | H3921h | 18-Jul-2006 |                       |
| 5 | H3921h | 18-Jul-2006 |                       |

---
